# 1 Mitogen-activated protein kinases are carbon dioxide receptors in plants.

2

3 Hanna Gałgańska<sup>1</sup>, Łukasz Gałgański<sup>1\*</sup>

4

5 <sup>1</sup>Molecular Biology Techniques Laboratory, Faculty of Biology, Adam Mickiewicz  
6 University in Poznań, Uniwersytetu Poznańskiego 6, 61-614 Poznań, Poland.

7 \*E-mail: [galgan@amu.edu.pl](mailto:galgan@amu.edu.pl)

8

9

## 10 **Abstract**

11 The amount of CO<sub>2</sub> in the atmosphere is increasing continuously in the industrial era,  
12 posing a threat to the ecological balance on Earth. There are two ways to reduce elevated CO<sub>2</sub>  
13 concentrations ([CO<sub>2</sub>]<sub>high</sub>): reducing human emissions or increasing their absorption by oceans  
14 and plants. However, in response to [CO<sub>2</sub>]<sub>high</sub>, plants diminish gas exchange and CO<sub>2</sub> uptake  
15 by closing stomata. Surprisingly, we do not know how plants sense CO<sub>2</sub> in their environment,  
16 and the basic mechanisms of the plant response to [CO<sub>2</sub>]<sub>high</sub> are very poorly understood. Here,  
17 we show that mitogen-activated protein kinases (MAPKs) are plant CO<sub>2</sub> receptors. We  
18 demonstrate that MPK4, a prominent MAPK that is known to be involved in the stomatal  
19 response to [CO<sub>2</sub>]<sub>high</sub><sup>1-3</sup>, is capable of binding CO<sub>2</sub> and is directly activated by a very low  
20 increase in [CO<sub>2</sub>] *in vivo* and *in vitro*. Unlike MPK4 activation by infections<sup>4</sup>, stress and  
21 hormones within known MAPK signalling cascades, [CO<sub>2</sub>]<sub>high</sub>-induced MPK4 activation is  
22 independent of the upstream regulators MKK1 and MKK2. Moreover, once activated, MPK4  
23 is prone to inactivation by bicarbonate. The identification of stress-responsive MPK4 as a  
24 CO<sub>2</sub> receptor sheds new light on the integration of various environmental signals in guard  
25 cells, setting up MPK4 as the main hub regulating CO<sub>2</sub> availability for photosynthesis. This  
26 result could help to find new ways to increase CO<sub>2</sub> uptake by plants.

27

28

## 29 **Introduction**

30 Abscisic acid (ABA) is the best studied regulator of stomatal closure, and for many  
31 years, ABA-induced signalling events were thought to direct stomatal closure triggered by  
32 [CO<sub>2</sub>]<sub>high</sub>. Recent studies, however, have proposed otherwise, suggesting that both pathways  
33 work together and that ABA enhances the response to [CO<sub>2</sub>]<sub>high</sub>; however, [CO<sub>2</sub>]<sub>high</sub> signalling

34 is still active in the absence of ABA and key elements of ABA signalling<sup>5</sup>. Only the  
35 downstream effectors, S-type anion channels, i.e., SLAC1, and some of their regulators are  
36 shared by the ABA and CO<sub>2</sub> pathways. Thus, except BIG<sup>6</sup> and RHC1<sup>7</sup>, the connections of  
37 which with core pathways remain unclear, known specific regulators of CO<sub>2</sub> signalling in  
38 guard cells belong to the MAPK superfamily. Among these proteins, CBC1/2<sup>8</sup> and HT1  
39 mitogen-activated protein kinase kinase kinases (MKKKs) are involved in pathways leading  
40 to low [CO<sub>2</sub>]-induced stomatal opening or inhibition of stomatal closure rather than [CO<sub>2</sub>]<sub>high</sub>-  
41 induced stomatal closure. In contrast, MPK12 and MPK4 are essential upstream mediators of  
42 the [CO<sub>2</sub>]<sub>high</sub><sup>1,2</sup> pathway promoting SLAC1-mediated stomatal closure via HT1<sup>3</sup> inactivation.

43 Because MPK12 orthologues are guard cell-specific kinases found only in  
44 *Brassicaceae*<sup>9</sup>, we focused on MPK4 to reveal the general mechanisms of [CO<sub>2</sub>]<sub>high</sub> sensing in  
45 all plants, as silencing of *NtMPK4* impaired [CO<sub>2</sub>]<sub>high</sub>- and dark-induced stomatal closure by  
46 disrupting the activation of slow-type anion channels in *Nicotiana tabacum*<sup>1</sup>.

47

## 48 **Results**

### 49 **MPK4 is activated by CO<sub>2</sub> *in vivo***

50 No kinase involved in plant CO<sub>2</sub> signalling has been shown to be activated by  
51 [CO<sub>2</sub>]<sub>high</sub> *in vivo* to date; therefore, we decided to study MPK4 activation in response to  
52 [CO<sub>2</sub>]<sub>high</sub> in epidermal peels. In line with the reported high activity of the *MPK4* promoter in  
53 guard cells<sup>4</sup>, we detected very high MPK4 expression in Arabidopsis epidermal peels using  
54 immunoblotting (Fig. 1a).

55 The activity of MPK4 was extremely low compared to that of the highly active MPK3  
56 and MPK6. The lack of MPK4 activation in the control samples indicates the maintenance of  
57 stress-free conditions in the experimental system used. We assumed that the method used to  
58 study [CO<sub>2</sub>]<sub>high</sub>-induced MPK activation should utilize direct analysis of the protein extract  
59 without lengthy sample preparation steps at indoor [CO<sub>2</sub>] under native conditions. Therefore,  
60 we rejected the classic in-gel kinase assay following kinase immunoprecipitation.

61 MPK4 is activated by as low as 20 μM CO<sub>2</sub>/HCO<sub>3</sub><sup>-</sup>, reaching the highest activity in  
62 120 μM CO<sub>2</sub>/HCO<sub>3</sub><sup>-</sup>. Consistent results were obtained when the source of CO<sub>2</sub>/HCO<sub>3</sub><sup>-</sup> was  
63 dissolved CO<sub>2</sub> (Fig. 1a) or KHCO<sub>3</sub> (Supplementary Fig. 1a-b). As stomatal closing in  
64 darkness is a typical physiological response to [CO<sub>2</sub>]<sub>high</sub> and is independent of arbitrarily  
65 imposed external CO<sub>2</sub> concentrations, we traced the effect of darkness on MPK4 activity over  
66 time. The result revealed MPK4 activation by darkness at time points from 5 to 20 min (peak  
67 at 10-15 min, p<0.001, Fig. 1b) compared to immediate (maximum at 2-5 min) activation by

68 externally provided  $[\text{CO}_2]_{\text{high}}$  (Fig. 1c) according to the very rapid stomatal closure in  
69 response to  $[\text{CO}_2]_{\text{high}}$ <sup>10</sup>. A decrease in monomeric MPK4 activity was accompanied by strong  
70 ( $p < 0.0001$ ) and transitory activation of the ~85-kDa form of MPK4 (Fig. 1c, Supplementary  
71 Fig. 2) corresponding to the MPK4 dimer in size according to the multimerization of active  
72 MPK4 in response to both  $\text{CO}_2$  (Galganska et al., in preparation) and  $\text{H}_2\text{O}_2$ <sup>11</sup>.

73 Generally, MAPKs function as a cascade in which MKKK phosphorylates and  
74 activates a mitogen-activated protein kinase kinase (MKK), which in turn activates an MPK.  
75 Therefore, a lack of  $[\text{CO}_2]_{\text{high}}$ -induced MPK4 activation would be expected in plants with  
76 blocked upstream MKKs if activation of MPK4 was a part of the secondary response to  
77  $[\text{CO}_2]_{\text{high}}$  within the MAPK cascade. Thus, we measured MPK4 activity in epidermal peels  
78 pre-treated with MKK inhibitors (PD98059 and U0126; Fig. 1d) and found that the increase in  
79 MPK4 activity in response to  $[\text{CO}_2]_{\text{high}}$  was still statistically significant, indicating MAPK  
80 cascade-independent activation of MPK4. Furthermore, we found that MPK4 activation in  
81 response to  $[\text{CO}_2]_{\text{high}}$  was intact in *ht1-2* (Fig. 1e), supporting previous data<sup>3</sup> showing the  
82 MPK4 position upstream of HT1.

83

#### 84 **MPK4 is activated by $\text{CO}_2$ *in vitro***

85 Based on the response of MPK4 to  $[\text{CO}_2]_{\text{high}}$  independent of upstream signalling (i),  
86 the upstream role of this protein in known  $\text{CO}_2$  signalling components (ii) and its importance  
87 in  $\text{CO}_2$  signalling (iii), we hypothesized that the role of MPK4 is that of a direct  $\text{CO}_2$  sensor.  
88 Thus, we measured MPK4 activity in response to  $[\text{CO}_2]_{\text{high}}$  *in vitro*.

89 A  $\text{CO}_2$  receptor is expected to sense very low  $[\text{CO}_2]$  because guard cells are able to  
90 react to slight changes in ambient  $[\text{CO}_2]$ , and the dissolved atmospheric  $[\text{CO}_2]$  in the acidic  
91 pH of the apoplast is expected to be slightly above 10  $\mu\text{M}$ . Moreover, upon its transport  
92 through the cell membrane,  $\text{CO}_2$  is spontaneously converted to  $\text{HCO}_3^-$  at cytoplasmic pH and  
93 further consumed by photosynthesis. There is no report clearly showing  $[\text{CO}_2]$  in guard cells.  
94 In addition, net  $\text{CO}_2$  uptake or production from mitochondrial respiration, photorespiration  
95 and photosynthetic  $\text{CO}_2$  fixation remains unclear in guard cells. Typically, the intracellular  
96 partial pressure of carbon dioxide ( $p\text{CO}_2$ ) in photosynthetic cells reaches approximately half  
97 the  $p\text{CO}_2$  concentration in the ambient air, but  $\text{CO}_2$  is unequally distributed within the cell<sup>12</sup>.

98 Based on these assumptions, MPK4 is activated by as low as 5  $\mu\text{M}$  dissolved  $\text{CO}_2$   
99 (Fig. 2a) or  $\text{KHCO}_3$  (Supplementary Fig. 3a-b) added to the *in vitro* phosphorylation mixture.  
100 MPK4 activation occurs in just a few seconds (Supplementary Fig. 3c), as shown by an  
101 increase in activation loop autophosphorylation. An increase in substrate protein

102 phosphorylation by MPK4 was observed 3 min after CO<sub>2</sub> administration (Fig. 2b). To  
103 carefully exclude any artefacts, we investigated MPK4 activation in several systems using  
104 GST-tagged MPK4 (Fig. 2b, Supplementary Fig. 3c) and tag-free MPK4 (Fig. 2a,  
105 Supplementary Fig. 3a) dephosphorylated by FastAP alkaline phosphatase. We used an anti-  
106 phospho-TEY antibody (Fig. 2a, Supplementary Fig. 3c) or an *in vitro* kinase assay using  
107 commercial myelin basic protein (MBP) as a standard MPK substrate (Supplementary Fig.  
108 3b,d) or recombinant JAZ12 as a specific and natural substrate of MPK4 (Fig. 2b,c). All of  
109 the abovementioned approaches confirmed that [CO<sub>2</sub>]<sub>high</sub> promoted MPK4 activation.  
110 However, only a low increase in [CO<sub>2</sub>] influenced MPK4 activity with a constant trend in the  
111 *in vitro* kinase activity assay; the application of 40 μM CO<sub>2</sub> or higher yielded variable results  
112 (Supplementary Fig. 3d), suggesting that MPK4 activity can be affected by both CO<sub>2</sub> forms,  
113 namely, free CO<sub>2</sub> and HCO<sub>3</sub><sup>-</sup>, with opposite effects. Thus, we measured [CO<sub>2</sub>]<sub>high</sub>-induced  
114 MPK4 activation in a pH-dependent manner because at low pH, the CO<sub>2</sub>/HCO<sub>3</sub><sup>-</sup> equilibrium  
115 is shifted towards increased free [CO<sub>2</sub>], whereas at high pH, the equilibrium is shifted towards  
116 increased [HCO<sub>3</sub><sup>-</sup>]. An increase in [CO<sub>2</sub>/HCO<sub>3</sub><sup>-</sup>] clearly activates MPK4 at low pH in contrast  
117 to high pH (Fig. 2c), indicating that an increase in [CO<sub>2</sub>] enhances MPK4 kinase activity and  
118 an increase in [HCO<sub>3</sub><sup>-</sup>] reduces MPK4 kinase activity. The negative effect of HCO<sub>3</sub><sup>-</sup> on MPK4  
119 activity was further confirmed in experiments with constant [CO<sub>2</sub>] and increasing [HCO<sub>3</sub><sup>-</sup>]  
120 (Supplementary Fig. 4a) and by direct comparison of [CO<sub>2</sub>] and [HCO<sub>3</sub><sup>-</sup>] (Supplementary Fig.  
121 4b).

122 One could wonder how MPK4 functions in cells, where the pH of the cytoplasm (7.0-  
123 7.2) promotes HCO<sub>3</sub><sup>-</sup> formation. MPK4 could be activated *in vivo* due to the action of  
124 carbonic anhydrases (CAs), which were shown to be essential for the CO<sub>2</sub> signalling  
125 pathway<sup>13</sup>. As CAs act in both directions to regulate the CO<sub>2</sub>/HCO<sub>3</sub><sup>-</sup> equilibrium, we added  
126 βCA4, one of the two most abundant Arabidopsis CAs<sup>13,14</sup>, to *in vitro* phosphorylation  
127 reactions. At pH 7.0, βCA4 increased [CO<sub>2</sub>] and reversed the MPK4 activity profile from  
128 MPK4 inactivation to MPK4 activation. Consequently, at pH 6.4, βCA4 increased [HCO<sub>3</sub><sup>-</sup>],  
129 leading to MPK4 inactivation instead of activation in the absence of βCA4 (Fig. 2d). These  
130 results support the positive role of CO<sub>2</sub> and the negative role of HCO<sub>3</sub><sup>-</sup> in MPK4 activation  
131 and demonstrate that the CO<sub>2</sub>/HCO<sub>3</sub><sup>-</sup> equilibrium, not pH, regulates MPK4 activity.

132

133

134

### 135 **MPK4 binds CO<sub>2</sub>**

136 The CO<sub>2</sub> receptor is expected to bind CO<sub>2</sub>. We verified that MPK4 efficiently bound  
137 <sup>14</sup>CO<sub>2</sub> (p<0.001) compared to both BSA and the sample devoid of protein (Fig. 3a,  
138 Supplementary Fig. 5a). However, it was not possible to precisely determine the K<sub>D</sub> for the  
139 MPK4-<sup>14</sup>CO<sub>2</sub> interaction because the experiments were carried out in an open system with  
140 free exchange of diluted <sup>14</sup>CO<sub>2</sub> with ambient atmosphere (i), <sup>12</sup>CO<sub>2</sub> was also available for  
141 MPK4 (ii), and possible competitive binding of H<sup>14</sup>CO<sub>3</sub><sup>-</sup> to MPK4 (iii). However, <sup>14</sup>CO<sub>2</sub>  
142 binding by MPK4 at low pH showed two maxima, and the first peak was reached at 10 μM  
143 <sup>14</sup>CO<sub>2</sub>/H<sup>14</sup>CO<sub>3</sub><sup>-</sup> (4.88 μM and 3.76 μM <sup>14</sup>CO<sub>2</sub> at pH 6.4 and 6.6, respectively; Fig. 3b) when  
144 the molar ratio of <sup>14</sup>CO<sub>2</sub> and MPK4 was approximately 1:1. Importantly, the graphs of <sup>14</sup>CO<sub>2</sub>  
145 binding with increasing [<sup>14</sup>CO<sub>2</sub>] in the pH series closely reflect the MPK4 activity graphs  
146 under the same conditions (Supplementary Fig. 5b-d). The coincident decrease in both MPK4  
147 activity and <sup>14</sup>CO<sub>2</sub> binding (in 15-20 μM CO<sub>2</sub>/HCO<sub>3</sub><sup>-</sup> at pH 6.4 and 6.6) indicates the stronger  
148 binding of <sup>14</sup>CO<sub>2</sub> than that of H<sup>14</sup>CO<sub>3</sub><sup>-</sup>. Taken together, the above data support the designation  
149 of MPK4 as a CO<sub>2</sub> receptor.

150

### 151 **Active MPK4 is prone to inactivation by HCO<sub>3</sub><sup>-</sup>**

152 To obtain further insight into the opposing effects of HCO<sub>3</sub><sup>-</sup> and CO<sub>2</sub> on MPK activity,  
153 we measured the [CO<sub>2</sub>]<sub>high</sub>-induced activation of several MPKs at pH 7.0 (Fig. 4a-b). It turned  
154 out that the higher MPK activity was under control conditions, the stronger the HCO<sub>3</sub><sup>-</sup>-  
155 induced inactivation of MPKs, and MPKs with low basal kinase activity (MPK12, MPK20,  
156 and *Hv*MPK4) were activated in response to [CO<sub>2</sub>]<sub>high</sub> without the effect of kinase  
157 inactivation. Because MPK activity depends on the phosphorylation of conserved TEY or  
158 TDY motif in the kinase activation loop, we investigated the impact of TEY phosphorylation  
159 on MPK4 activity regulation by both CO<sub>2</sub> and HCO<sub>3</sub><sup>-</sup> using MPK4 versions with modified  
160 TEY motif (Fig. 4c-e).

161 Mutants mimicking MPK4 with phosphorylated Y203 of TEY (MPK4<sup>T201E/Y203E</sup>,  
162 MPK4<sup>T201E/V204E</sup> and MPK4<sup>T201E/Y203E/V204E</sup>), reflecting full MPK4 activity, could not be  
163 further activated by [CO<sub>2</sub>]<sub>high</sub>, whereas unphosphorylated MPK4 (MPK4<sup>T201A/Y203F</sup>) and  
164 MPK4 with only T201 phosphorylated (MPK4<sup>T201E</sup>) were still prone to [CO<sub>2</sub>]<sub>high</sub>-induced  
165 activation (Fig. 4c). Thus, [CO<sub>2</sub>]<sub>high</sub> not only promotes TEY phosphorylation (Fig. 2a) but also  
166 acts as an additional activity enhancer of inactive or incompletely activated MPK4.

167 All the mutants tested were negatively regulated by  $\text{HCO}_3^-$  at pH 7.0 (~85%  $\text{HCO}_3^-$   
168 and ~15%  $\text{CO}_2$ ) (Fig. 4c). Lowering the pH to 6.6 (~62%  $\text{HCO}_3^-$  and ~38%  $\text{CO}_2$ ) eliminated  
169  $\text{HCO}_3^-$ -induced inactivation of all MPK4 forms with phosphorylated Y203 (Fig. 4e). This  
170 result is consistent with the decrease in  $^{14}\text{CO}_2/\text{H}^{14}\text{CO}_3^-$  binding in the concentration range of  
171 15-20  $\mu\text{M}$  at pH 6.6 (Fig. 3b) and further supports lower binding of  $\text{HCO}_3^-$  than of  $\text{CO}_2$  by  
172 MPK4. Importantly, T201 phosphorylation (MPK4<sup>T201E</sup>, MPK4<sup>T201E/Y203F</sup>), in contrast to  
173 unphosphorylated T201 (MPK4<sup>T201A/Y203F</sup>), enhances MPK4 susceptibility to inhibition by  
174  $\text{HCO}_3^-$  (Fig. 4e).

175 The effects of TEY phosphorylation on  $\text{HCO}_3^-$ -triggered inhibition of MPK4 were  
176 further confirmed using WT MPK4. MPK4 preincubated with ATP (autophosphorylated on  
177 TEY) before  $\text{CO}_2$  addition is prone to strong  $\text{HCO}_3^-$ -induced inactivation, in contrast to  
178 preincubation of MPK4 with  $\text{CO}_2$  before ATP application or administration of both ATP and  
179  $\text{CO}_2$  at the same time (Fig. 4f). This indicates competition between  $\text{CO}_2$  and  $\text{HCO}_3^-$ . The  
180 effect of  $\text{HCO}_3^-$  becomes noticeable at high  $[\text{HCO}_3^-]$  or at  $\text{pH} \geq 7$  (high  $[\text{HCO}_3^-]/[\text{CO}_2]$  ratio)  
181 only when the TEY of MPK4 is already phosphorylated. Accordingly,  $\text{HCO}_3^-$  does not  
182 influence  $[\text{CO}_2]_{\text{high}}$ -induced TEY phosphorylation; in contrast to the decrease in MPK4  
183 activity observed as MBP or JAZ12 phosphorylation at  $\text{pH} \geq 7$ ,  $[\text{CO}_2]_{\text{high}}$ -induced TEY  
184 phosphorylation is not inhibited by  $\text{HCO}_3^-$  (Supplementary Fig. 6).

185 As studies on kinase activity can be conducted only in the presence of ATP, we  
186 employed a  $^{14}\text{CO}_2$  binding assay to further investigate the role of ATP in  $\text{CO}_2$  sensing by  
187 MPK4. MPK4 preincubation with ATP impaired  $^{14}\text{CO}_2$  binding 3-fold compared to that  
188 observed when both  $^{14}\text{CO}_2$  and ATP were added at the same time or when  $^{14}\text{CO}_2$   
189 preincubation was conducted before ATP delivery (Fig. 3c). However, ATP does not  
190 influence the  $^{14}\text{CO}_2$  binding of MPK4 mutants mimicking phosphorylated TEY  
191 (MPK4<sup>T201E/Y203E</sup>, MPK4<sup>T201E/Y203E/V204E</sup>). In contrast, ATP diminished (3-fold)  $^{14}\text{CO}_2/\text{H}^{14}\text{CO}_3^-$   
192 binding by MPK4<sup>T201E</sup> (Fig. 3d), indicating that the transition from pTEY to pTEpY is crucial  
193 for ATP-dependent  $^{14}\text{CO}_2/\text{H}^{14}\text{CO}_3^-$  binding. Moreover, the weakened  $\text{CO}_2$  binding by  
194 MPK4<sup>T201A/Y203F</sup> supports the importance of TEY for  $\text{CO}_2$  recognition.

195 The lack of  $\text{CO}_2$  binding under high ATP availability may underlie the mechanism for  
196 elimination of fluctuations in endogenous  $[\text{CO}_2]$ , because when ATP availability increases,  
197  $[\text{CO}_2]$  increases locally due to the proximity of mitochondria. Interestingly, MPK4  
198 inactivation is strongest at concentrations of dissolved atmospheric  $\text{CO}_2$  and at very high  
199  $[\text{CO}_2]$ . Physiologically, such a strong  $\text{HCO}_3^-$ -induced inhibitory effect on activated MPK4  
200 seems to be a very effective autoregulatory mechanism, in which the  $\text{CO}_2$  sensor is inactivated

201 during a long-term increase in [CO<sub>2</sub>] (mainly HCO<sub>3</sub><sup>-</sup> at the pH of the cytoplasm). This may  
202 also be an important mechanism of cross-talk between CO<sub>2</sub> and stress signalling, as different  
203 adverse conditions activate MPK4, leading to modification of the plant response to CO<sub>2</sub>  
204 during stress (Supplementary Fig. 7).

205 In general, our findings are important for the regulation of plant growth and  
206 development by CO<sub>2</sub>, as MPK4 regulates cytokinesis<sup>15</sup> and photosynthesis<sup>16</sup>. The best  
207 summary of this is a picture of the highly enlarged stomata (Supplementary Fig. 8) of  
208 extremely dwarfed *mpk4* plants<sup>4,16</sup>, supporting previous results from tobacco plants with  
209 silenced *NtMPK4*<sup>1</sup>.

210 The broad importance of the presented results could be considered because MAPKs  
211 are conserved enzymes in all eukaryotes. In human lungs, MAPKs are activated by SARS-  
212 CoV, SARS-CoV-2<sup>17,18</sup> and other causative agents of pneumonia<sup>19–23</sup> to trigger the production  
213 of proinflammatory cytokines. Angiotensin-converting enzyme 2 (ACE2) inhibits MAPK  
214 signalling<sup>19</sup> and thus protects against severe lung diseases caused by lipopolysaccharide<sup>20,21</sup>,  
215 bleomycin<sup>19</sup>, and cigarette smoke<sup>22</sup> and particulate matter 2.5 (PM2.5) exposure<sup>23</sup>. However,  
216 ACE2 is bound by SARS-CoV-2<sup>24,25</sup>, leading to cytokine storms and a severe course of  
217 pneumonia and resulting in acute respiratory distress syndrome (ARDS) and pulmonary  
218 fibrosis. Therefore, the inhibition of active MAPKs could be a strategy to prevent the acute  
219 course of COVID-19. Based on the inactivation of active plant MPKs by CO<sub>2</sub> described  
220 herein, we encourage researchers to study the inhibitory effect of CO<sub>2</sub> on human MAPKs  
221 because both synthetic MAPK inhibitors<sup>26</sup> and ten-minute inhalation of 5% CO<sub>2</sub><sup>27</sup> protect  
222 against lipopolysaccharide-induced lung injury in mice. In addition, tobacco smoke has been  
223 suggested recently to be a protective factor against the development of COVID-19 symptoms.  
224 Importantly, CO<sub>2</sub> is a natural and safe gas in the lungs, and short-term CO<sub>2</sub> inhalation is  
225 beneficial for the respiratory, nervous<sup>28–30</sup> and circulatory<sup>31,32</sup> systems.

## 226 **Methods**

### 227 **General considerations**

228 All protein purifications, handling of purified proteins and experiments using extracted  
229 proteins were carried out in empty rooms (max. 2 persons/40 m<sup>2</sup>) with open windows  
230 providing fresh air. During the heating season, no research was conducted on windless days or  
231 when the PM10 concentration in air exceeded 30 µg m<sup>-3</sup>. The breath was not directed towards  
232 the open tubes and pipette tips. Ice was not used due to the reduction in CO<sub>2</sub> solubility with  
233 increasing temperature and because of ice production from high-pH water in our laboratory.

234 All solutions were prepared using acidified (pH 4.8-5.2) CO<sub>2</sub>-free water in rooms with fresh  
235 air. Solutions were stored frozen, or the pH was adjusted immediately before use. MPK  
236 purification or modification (e.g., dephosphorylation or protease digestion) was followed by  
237 protein desalting using Amicon Ultra filters (Millipore, Billerica, MA) to remove HCO<sub>3</sub><sup>-</sup> and  
238 other salts and buffers.

239 Solutions containing the indicated CO<sub>2</sub> or HCO<sub>3</sub><sup>-</sup> concentrations were prepared from  
240 freshly dissolved 100 mM KHCO<sub>3</sub><sup>-</sup> or CO<sub>2</sub>-saturated water. The CO<sub>2</sub> concentration in CO<sub>2</sub>-  
241 saturated water was calculated based on the temperature of the CO<sub>2</sub> solution and atmospheric  
242 pressure. Water carbonation was conducted in a different room from the other experiments.

243 All *in vitro* experiments were carried out in atmospheric [CO<sub>2</sub>]; thus, some extent of  
244 atmospheric CO<sub>2</sub> was dissolved in the control reactions. We considered applying a CO<sub>2</sub>-free  
245 atmosphere, but that could lead to increased release of CO<sub>2</sub> from [CO<sub>2</sub>]<sub>high</sub> reactions. The use  
246 of atmospheric CO<sub>2</sub> partially limited CO<sub>2</sub> loss from [CO<sub>2</sub>]<sub>high</sub> reactions. Moreover, we  
247 maximally reduced the number of reactions prepared simultaneously to limit CO<sub>2</sub> loss from  
248 [CO<sub>2</sub>]<sub>high</sub> reactions.

249

## 250 **Plant growth**

251 Arabidopsis WT Columbia-0 ecotype plants; mutant lines *ht1-2*<sup>37</sup>, *mpk4-2* (SALK\_056245),  
252 *mpk3-1* (SALK\_151594), and *mkk1 mkk2*; and a line expressing One-STrEP-tag-MPK4 were  
253 grown on soil in a GIR 96 growth chamber (Convion, Winnipeg, Canada) at 22°C and 60–  
254 70% humidity under a 16-h light (100 μmol m<sup>-2</sup> s<sup>-1</sup>)/8-h dark photoperiod.

255

## 256 **Preparation and treatment of epidermal peels**

257 For 20 preparations, 300-350 rosette leaves (~45 g) excised from 3-week-old Arabidopsis  
258 plants were blended in 1,400 ml of demineralised water for 1.5 min. For 2 preparations from  
259 5-week-old *mpk4-2* or *mkk1 mkk2* plants, 160-200 shoots were blended in 600 ml of  
260 demineralised water for 2 min. Epidermal peels were then collected on 100-μm Sefar Nitex  
261 mesh (Sefar AG, Heiden, Switzerland), washed three times with stomatal opening solution  
262 (20 mM MES-KOH (pH 5.7), 10 mM KCl, 50 μM CaCl<sub>2</sub>) and incubated in open tubes in 10  
263 ml of stomatal opening solution for 3 h in a GIR 96 growth chamber. Under the indicated  
264 treatment, epidermal peels were retained on Sefar Nitex mesh and frozen in liquid nitrogen.

265

266

267



## 268 **Protein extraction from epidermal peels**

269 Frozen epidermal peels (1.5 ml) were ground in a mortar upon the addition of 1.1 g of  
270 sucrose, 80 µl of 1.5 M Tris (pH 8.0), 80 µl of 20% SDS, 80 µl of β-mercaptoethanol and 4  
271 ml of phenol equilibrated with 10 mM Tris-HCl (pH 8.0). The lysate was vortexed for 30 s,  
272 incubated for 3 min at RT and centrifuged (1 min, 500 x g, 4°C). The upper organic phase  
273 was transferred to 9 ml of isopropanol with 100 mM ammonium acetate. Proteins were  
274 precipitated at -20°C for 24 h and centrifuged (12,000 x g, 15 min, 4°C). The pellet was  
275 washed with 14 ml of methanol and then with 12 ml of ethanol and dried in air for 20 min at  
276 RT. Proteins were dissolved in 200 µl of Laemmli sample buffer with cOmplete EDTA-free  
277 Protease Inhibitor Cocktail (Roche, Mannheim, Germany) for 15 min at RT.

278

## 279 **One-STrEP-tag affinity purification**

280 The coding sequences of the One-STrEP-tag fusion proteins under the control of the  
281 Arabidopsis *UBQ10* promoter and *NOS* terminator<sup>35,36</sup>, cloned in the binary vector pART27<sup>38</sup>,  
282 were stably expressed in Arabidopsis Col-0 plants following *Agrobacterium tumefaciens*  
283 (strain GV3101)-mediated transformation. Epidermal peels from 10 g of rosette leaves were  
284 ground in liquid nitrogen, resuspended in 3 ml of extraction buffer (100 mM Tris-HCl (pH  
285 8.0), 200 mM NaCl, 100 mM NaF, 10 mM EDTA, 0.4% Triton X-100, 3 mM DTT, 3.2 mM  
286 Na<sub>3</sub>VO<sub>4</sub>, cOmplete EDTA-free Protease Inhibitor Cocktail (Roche, Mannheim, Germany))  
287 and filtered on Sefar Nitex mesh (Sefar AG, Heiden, Switzerland). After centrifugation  
288 (13,000 x g, 4 min, 4°C), the supernatant was loaded onto Bio-Spin<sup>®</sup> chromatography  
289 columns (Bio-Rad) containing 50 µl of Strep-Tactin Superflow high-capacity resin (IBA,  
290 Goettingen, Germany). After six washing steps (100 mM Tris-HCl (pH 8.0), 150 mM NaCl),  
291 proteins were eluted with 400 µl of 5 mM desthiobiotin (IBA, Goettingen, Germany) in  
292 washing solution, concentrated with Amicon Ultra 10K filters (Millipore, Billerica, MA,  
293 USA), aliquoted and stored at -80°C.

294

## 295 **High-resolution electrophoresis**

296 Tris-glycine SDS-PAGE was carried out in a discontinuous buffer system with a 5% stacking  
297 gel (pH 6.8) and 9% resolving gel (pH 8.8). A total of 30-50 µg of total protein was loaded  
298 per lane of the gel (26 cm length, 14 cm width and 1 mm thickness). A step voltage reduction  
299 of 10 V every 10 min from 180 V to 140 V was applied during protein concentration in the

300 stacking gel. In the resolving gel, electrophoresis was conducted at a constant current of 12  
301 mA/gel (max. 180 V) for 16 h at room temperature.

302

### 303 **Immunoblotting**

304 Denatured proteins separated on an 8-11.5% SDS-PAGE gel were transferred onto  
305 nitrocellulose membranes. The membranes were blocked for 60 min in 5% skimmed milk in  
306 TBST (20 mM Tris, 0.8% NaCl, 0.05% Tween-20) or 7% BSA in TBST and incubated at  
307 room temperature for 1 h with anti-MPK3, anti-MPK4, anti-MPK6 (1:500, Sigma-Aldrich,  
308 Steinheim, Germany), anti-thiophosphate ester (anti-TE, ab92570, 1:5,000, Abcam,  
309 Cambridge, UK), anti-phospho-MBP (13-104, 1:200, Merck) or phospho-p44/42 MAPK  
310 (Erk1/2) (Thr202/Tyr204) antibody (anti-phospho-TEY, #9101, 1:200, Cell Signaling  
311 Technology, Danvers, MA, USA). Membranes were washed 3 times for 5 min with TBST and  
312 incubated for 1 h with the appropriate secondary antibody – goat anti-rabbit (1:20,000,  
313 Agrisera, Vännäs, Sweden) or goat anti-mouse (1:160,000 Thermo Scientific, Rockford, IL,  
314 USA). Detection was performed with ECL (Thermo Scientific, Rockford, IL, USA) according  
315 to the manufacturer's instructions.

316

### 317 ***In vitro* MPK activity measurement**

318 Due to the tendency of active MPK4 to aggregate<sup>11</sup>, MPK4 was diluted to working  
319 concentration in CO<sub>2</sub>-free water containing 2.5 mM DTT and, when indicated, 1 mg/ml BSA  
320 (0.4 mg ml<sup>-1</sup> in *in vitro* reaction) as an antiaggregatory factor<sup>39</sup>. One-STrEP-tagged kinases  
321 purified from Arabidopsis epidermal peels or 0.2-1 µg of kinases overexpressed in bacteria  
322 was incubated (25 min at 30°C or as indicated) with 2.5 µg of MBP (Millipore, Temecula,  
323 CA, USA) or 0.5 µg of another substrate protein, as indicated, in buffer containing 40 mM  
324 MOPS (pH 7.0 or as indicated), 0.5 mM EGTA, 1 mM DTT, 20 mM MgCl<sub>2</sub>, 200 µM ATP  
325 and Protease and Phosphatase Inhibitor Tablets, EDTA Free (Thermo Scientific, Rockford,  
326 IL, USA). When protein thiophosphorylation was detected by immunoblotting with anti-TE<sup>40</sup>,  
327 reactions were performed in buffer containing 40 mM MOPS (pH 7.0 or as indicated), 0.5  
328 mM EGTA, 1 mM DTT, 20 mM MgCl<sub>2</sub>, 1 ATP-γ-S (adenosine-5'-O-(3-thiotriphosphate),  
329 BIOLOG Life Science Institute, Bremen, Germany) and Protease and Phosphatase Inhibitor  
330 Tablets, EDTA Free (Thermo Scientific, Rockford, IL, USA). After thiophosphorylation, 2.5  
331 mM *p*-nitrobenzyl mesylate (Abcam, Cambridge, UK) was added, and the samples were  
332 further incubated for 25 min at room temperature. Then, proteins were separated by SDS-

333 PAGE and subjected to immunoblotting with anti-TE, anti-phospho-MBP or anti-phospho-  
334 TEY.

335

### 336 **CO<sub>2</sub> binding assay**

337 Four micrograms of MPKs was incubated for 10 min at 24°C in 100 µl of binding reaction  
338 containing 100 mM MOPS (pH 6.4-7.0 as indicated), 5 mM EGTA, 20 mM MgCl<sub>2</sub>, 1 mM  
339 DTT, 200 µM ATP (optional), cOmplete EDTA-free Protease Inhibitor Cocktail (Roche,  
340 Mannheim, Germany) and the indicated concentration of [<sup>14</sup>C] KHCO<sub>3</sub> (50-60 mCi mmol<sup>-1</sup>).  
341 Then, the samples were vortexed for 30 s and loaded onto 2 ml of Sephadex G-25 coarse  
342 (Pharmacia) in Bio-Spin<sup>®</sup> chromatography columns and washed with 240 µl of washing  
343 buffer containing 20 mM MES (pH 6.4-7.0 according to the pH of the binding reaction), 2%  
344 BSA, 20 mM MgCl<sub>2</sub>, 2 mM DTT, and 50 mM NaCl. Then, proteins were eluted using  
345 washing buffer. Two 100-µl fractions were collected in 50 µl of 1.5 M Tris-HCl (pH 8.0) and  
346 1 ml of Ultima Gold LLT scintillation cocktail (Perkin Elmer). Radioactivity was measured  
347 using a liquid scintillation analyser (Packard).

348

### 349 **Barley mesophyll protoplast transformation**

350 Twenty 6- to 7-day-old barley leaves were sliced crosswise to obtain scraps with minimal  
351 thickness. Sliced material was incubated in 60 ml of enzyme solution (0.615 M mannitol,  
352 1.5% Cellulase Onozuka R10 (Serva, Heidelberg, Germany), 0.3% Macerozyme R10 from  
353 *Rhizopus sp.* (Serva, Heidelberg, Germany), 1% BSA, 10 mM MES; pH 5.7) for 3 h at 28°C.  
354 After slow cooling (20 min at 4°C), the suspension was gently swirled to facilitate protoplast  
355 release and filtered through 100-µm Sefar Nitex mesh. Subsequent stages were carried out on  
356 ice or at 4°C. Protoplasts were centrifuged at 250 x g for 4 min and washed twice with 0.615  
357 M mannitol. Protoplasts (2x10<sup>5</sup>) resuspended in 0.615 M mannitol were added to 40 µg of  
358 individual plasmids in 0.615 M mannitol in a final volume of 110 µl. Electroporation was  
359 carried out using Gene Pulser Xcell (Bio-Rad) in 4-mm electroporation cuvettes (Bio-Rad)  
360 with the following setting: a single pulse at 150 V with an 8-ms pulse duration. Immediately,  
361 1 ml of ice-cold 0.615 M mannitol was added, and protoplasts were transferred to 2-ml tubes.  
362 The protoplasts were allowed to sediment for 20 min at room temperature before resuspension  
363 in incubation solution (0.615 M mannitol (pH 5.9), 10 mM CaCl<sub>2</sub>, 1 mM MgSO<sub>4</sub>, 1 mM  
364 KNO<sub>3</sub>, 100 µM KH<sub>2</sub>PO<sub>4</sub>, 10 µM KI, 1 µM CuSO<sub>4</sub>). Protein localization was documented after  
365 overnight incubation at 21°C.

### 366 **Arabidopsis mesophyll protoplast transformation**

367 The epidermis from the underside of 6-7 rosette leaves (from 4-5-week-old plants) was peeled  
368 away using Scotch Magic Tape 3M adhered to both sides of the leaf<sup>41</sup>. Leaves were incubated  
369 in Petri dishes with 10 ml of enzyme solution (1.2% Cellulase Onozuka R10, 0.4%  
370 Macerozyme R10, 0.4 M mannitol, 20 mM KCl, 20 mM MES; pH 5.7) for 90 min at room  
371 temperature with gentle rotation (20 rpm on a platform shaker). Protoplasts were then diluted  
372 (1:1) with ice-cold W5 solution (154 mM NaCl, 125 mM CaCl<sub>2</sub>, 5 mM KCl, 2 mM MES; pH  
373 5.7), centrifuged (3 min, 100 x g, 4°C) and washed twice with 30 ml of ice-cold W5 solution.  
374 After the last wash, protoplasts were allowed to sediment on ice for 30 min and resuspended  
375 in MMg solution (0.4 M mannitol, 15 mM MgCl<sub>2</sub>, 4 mM MES; pH 5.7) to obtain a  
376 concentration of 2×10<sup>4</sup> cells ml<sup>-1</sup>. For transfection<sup>42</sup>, 100 µl of protoplasts were transferred to  
377 wells of U96 Microwell plates (Thermo Scientific Nunc), mixed (700 rpm) with 5 µg of  
378 plasmids (in 10 µl) and 110 µl of PEG solution (40% PEG 4,000, 200 mM mannitol, 100 mM  
379 CaCl<sub>2</sub>), and incubated for 5 min (with 10 s of mixing at intervals of 50 s) at room temperature.  
380 Then, 200 µl of W5 solution was added and mixed (800 rpm for 10 s). Protoplasts were  
381 centrifuged at 100 x g for 1 min and washed 4 times with W5 solution (200 µl of solution  
382 from the wells was removed, and 200 µl of fresh W5 was added, mixed for 10 s at 800 rpm  
383 and centrifuged at 100 x g for 1 min). Protoplasts were incubated in a growing chamber for  
384 12-16 h.

385

### 386 **Arabidopsis guard cell protoplast transformation**

387 Epidermises from the undersides of 12 rosette leaves (from 4- to 5-week-old plants) were  
388 incubated in Petri dishes with 10 ml of enzyme solution (1.8% Cellulase Onozuka R10, 0.8%  
389 Macerozyme R10, 0.4 M mannitol, 20 mM KCl, 20 mM MES; pH 5.7) at room temperature  
390 with gentle rotation (20 rpm on a platform shaker) until all mesophyll and most pavement  
391 cells peeled off. Guard cells bound to the Scotch Magic Tape were transferred to a fresh  
392 portion of enzyme solution and digested for 30-45 min. Protoplasts were then centrifuged (5  
393 min, 450 x g) and washed with 30 ml of MMg. Finally, MMg was added to obtain 1×10<sup>5</sup> cells  
394 ml<sup>-1</sup>. All subsequent steps were carried out as described for mesophyll protoplasts, with  
395 modified centrifugation steps (300 x g, 2 min). Guard cell protoplasts were incubated in  
396 modified W1 solution (0.5 M mannitol, 15 mM KCl, 50 µM CaCl<sub>2</sub> and 10 mM MES-Tris; pH  
397 6.15) in a growing chamber for 12-16 h.

398

### 399 **Protein localization**

400 Arabidopsis guard cell or mesophyll protoplasts and barley mesophyll protoplasts were  
401 transfected with plasmids encoding proteins fused to EYFP (pSAT4A-EYFP-N1 vector<sup>43</sup>).  
402 After transfection, protoplasts were transferred to black 96-well black glass-bottom plates  
403 (SensyPlate, Greiner Bio-One) and incubated overnight in a growth chamber. Protein  
404 localization was documented with a Nikon A1Rsi confocal system with the following  
405 settings: dichroic mirror, 457/514; A1-DU4 4 detector unit; filter, 540/30. An argon ion laser  
406 (514 nm, laser power: 0.8) was used for excitation of EYFP.

407

### 408 **Plasmid construction**

409 All plasmids used were modified such that *Sfi*I restriction sites (arranged as in the pUNI51  
410 vector, GenBank accession AY260846) were placed into their polylinkers. pUNI51 clones  
411 containing coding sequences of MPK2 (U10062), MPK4 (U09192), MPK6 (U15193),  
412 MPK12 (U82548) and MPK20 (U13519) were obtained from the Arabidopsis Biological  
413 Resource Center (Columbus, OH, USA). Other coding sequences were amplified from  
414 Arabidopsis or barley cDNAs and cloned in pUNI51. Plasmids encoding GST-fusion proteins  
415 were constructed in pGEX-6P-1 (MPK4, MPK4 mutants) or by loxP/Cre-based recombination  
416 of pHB2-GST and pUNI51 plasmids<sup>44</sup> (other MPKs).

417

### 418 **Statistical analysis**

419 The presented statistically significant differences in results from at least three experiments  
420 (means  $\pm$  standard deviations) were based on one-way or factorial ANOVA, followed by  
421 Tukey's post hoc comparison.

422 ImageJ software<sup>45</sup> was employed for densitometric analysis of immunoblotting bands. Kinase  
423 activities were calculated in terms of protein amounts. For data normalization, the sum of all  
424 kinase activity measurements throughout the experiment was taken as 1. Then, for clarity, the  
425 value of the control was taken as 1.

426

### 427 **Acknowledgements**

428 The authors thank Mirosława Dabert and Wiesława Jarmuszkiewicz for logistic and  
429 mentoring support, Adam Augustyniak and Michał Kopa for technical assistance and Dawid  
430 Bielewicz, Tomasz Bieluszewski, Koh Iba and Yuelin Zhang for providing seeds. This work  
431 was supported by the National Science Center, Poland (UMO-2011/01/D/NZ3/02068 to ŁG  
432 and UMO-2015/19/D/NZ3/00479 to HG).

433 **Author Contributions:** HG and ŁG: Conceptualization, funding acquisition, experiment  
434 execution, data analysis, and writing.

435

436 **Competing interests.** The authors declare no competing interests.

437

## 438 **References**

- 439 1. Marten, H. *et al.* Silencing of *Nt* MPK4 impairs CO<sub>2</sub> -induced stomatal closure,  
440 activation of anion channels and cytosolic Ca<sup>2+</sup> signals in *Nicotiana tabacum* guard  
441 cells. *Plant J.* **55**, 698–708 (2008).
- 442 2. Töldsepp, K. *et al.* Mitogen-activated protein kinases MPK4 and MPK12 are key  
443 components mediating CO<sub>2</sub>-induced stomatal movements. *Plant J.* **96**, 1018–1035  
444 (2018).
- 445 3. Hōrak, H. *et al.* A Dominant Mutation in the HT1 Kinase Uncovers Roles of MAP  
446 Kinases and GHR1 in CO<sub>2</sub>-Induced Stomatal Closure. *Plant Cell* **28**, 2493–2509  
447 (2016).
- 448 4. Petersen, M. *et al.* Arabidopsis MAP Kinase 4 Negatively Regulates Systemic  
449 Acquired Resistance. *Cell* **103**, 1111–1120 (2000).
- 450 5. Hsu, P.-K. *et al.* Abscisic acid-independent stomatal CO<sub>2</sub> signal transduction pathway  
451 and convergence of CO<sub>2</sub> and ABA signaling downstream of OST1 kinase. *Proc. Natl.*  
452 *Acad. Sci.* **115**, E9971–E9980 (2018).
- 453 6. He, J. *et al.* The BIG protein distinguishes the process of CO<sub>2</sub>-induced stomatal closure  
454 from the inhibition of stomatal opening by CO<sub>2</sub>. *New Phytol.* **218**, 232–241 (2018).
- 455 7. Tian, W. *et al.* A molecular pathway for CO<sub>2</sub> response in Arabidopsis guard cells. *Nat.*  
456 *Commun.* **6**, 6057 (2015).
- 457 8. Hiyama, A. *et al.* Blue light and CO<sub>2</sub> signals converge to regulate light-induced  
458 stomatal opening. *Nat. Commun.* **8**, 1284 (2017).
- 459 9. Jakobson, L. *et al.* Natural Variation in Arabidopsis Cvi-0 Accession Reveals an  
460 Important Role of MPK12 in Guard Cell CO<sub>2</sub> Signaling. *PLOS Biol.* **14**, e2000322  
461 (2016).
- 462 10. Raschke, K. Saturation Kinetics of the Velocity of Stomatal Closing in Response to  
463 CO<sub>2</sub>. *Plant Physiol.* **49**, 229–34 (1972).
- 464 11. Zhang, T., Zhu, M., Song, W., Harmon, A. C. & Chen, S. Oxidation and  
465 phosphorylation of MAP kinase 4 cause protein aggregation. *Biochim. Biophys. Acta -*  
466 *Proteins Proteomics* **1854**, 156–165 (2015).

- 467 12. Berghuijs, H. N. C. *et al.* Localization of (photo)respiration and CO<sub>2</sub> re-assimilation in  
468 tomato leaves investigated with a reaction-diffusion model. *PLoS One* **12**, e0183746  
469 (2017).
- 470 13. Hu, H. *et al.* Carbonic anhydrases are upstream regulators of CO<sub>2</sub>-controlled stomatal  
471 movements in guard cells. *Nat. Cell Biol.* **12**, 87–93 (2010).
- 472 14. DiMario, R. J. *et al.* The Cytoplasmic Carbonic Anhydrases  $\beta$ CA2 and  $\beta$ CA4 Are  
473 Required for Optimal Plant Growth at Low CO<sub>2</sub>. *Plant Physiol.* **171**, 280–93 (2016).
- 474 15. Kosetsu, K. *et al.* The MAP kinase MPK4 is required for cytokinesis in *Arabidopsis*  
475 *thaliana*. *Plant Cell* **22**, 3778–90 (2010).
- 476 16. Gawroński, P. *et al.* Mitogen-activated protein kinase 4 is a salicylic acid-independent  
477 regulator of growth but not of photosynthesis in *Arabidopsis*. *Mol. Plant* **7**, 1151–66  
478 (2014).
- 479 17. Imai, Y. *et al.* Angiotensin-converting enzyme 2 protects from severe acute lung  
480 failure. *Nature* **436**, 112–6 (2005).
- 481 18. Chen, I.-Y. *et al.* Upregulation of the chemokine (C-C motif) ligand 2 via a severe  
482 acute respiratory syndrome coronavirus spike-ACE2 signaling pathway. *J. Virol.* **84**,  
483 7703–12 (2010).
- 484 19. Meng, Y. *et al.* Angiotensin-converting enzyme 2/angiotensin-(1-7)/Mas axis protects  
485 against lung fibrosis by inhibiting the MAPK/NF- $\kappa$ B pathway. *Am. J. Respir. Cell Mol.*  
486 *Biol.* **50**, 723–36 (2014).
- 487 20. Li, Y. *et al.* Angiotensin-converting enzyme 2 prevents lipopolysaccharide-induced rat  
488 acute lung injury via suppressing the ERK1/2 and NF- $\kappa$ B signaling pathways. *Sci. Rep.*  
489 **6**, 27911 (2016).
- 490 21. Li, Y. *et al.* Angiotensin-converting enzyme inhibition attenuates lipopolysaccharide-  
491 induced lung injury by regulating the balance between angiotensin-converting enzyme  
492 and angiotensin-converting enzyme 2 and inhibiting mitogen-activated protein kinase  
493 activation. *Shock* **43**, 395–404 (2015).
- 494 22. Hung, Y.-H. *et al.* Alternative Roles of STAT3 and MAPK Signaling Pathways in the  
495 MMPs Activation and Progression of Lung Injury Induced by Cigarette Smoke  
496 Exposure in ACE2 Knockout Mice. *Int. J. Biol. Sci.* **12**, 454–65 (2016).
- 497 23. Lin, C.-I. *et al.* Instillation of particulate matter 2.5 induced acute lung injury and  
498 attenuated the injury recovery in ACE2 knockout mice. *Int. J. Biol. Sci.* **14**, 253–265  
499 (2018).
- 500 24. Zhou, P. *et al.* A pneumonia outbreak associated with a new coronavirus of probable

- 501 bat origin. *Nature* **579**, 270–273 (2020).
- 502 25. Lan, J. *et al.* Structure of the SARS-CoV-2 spike receptor-binding domain bound to the  
503 ACE2 receptor. *Nature* (2020). doi:10.1038/s41586-020-2180-5
- 504 26. Schuh, K. & Pahl, A. Inhibition of the MAP Kinase ERK Protects From  
505 Lipopolysaccharide-Induced Lung Injury. *Biochem. Pharmacol.* **77**, (2009).
- 506 27. Tang, S.-E. *et al.* Pre-Treatment with Ten-Minute Carbon Dioxide Inhalation Prevents  
507 Lipopolysaccharide-Induced Lung Injury in Mice via Down-Regulation of Toll-Like  
508 Receptor 4 Expression. *Int. J. Mol. Sci.* **20**, (2019).
- 509 28. Schmetterer L, Lexer F, Findl O, Graselli U, Eichler HG, W. M. The Effect of  
510 Inhalation of Different Mixtures of O<sub>2</sub> and CO<sub>2</sub> on Ocular Fundus Pulsations. *Exp. Eye*  
511 *Res.* **63**, 351–355 (1996).
- 512 29. Ohlraun, S. *et al.* CARBON DIOXIDE for the treatment of Febrile seizures: rationale,  
513 feasibility, and design of the CARDIF-study. *J. Transl. Med.* **11**, 157 (2013).
- 514 30. Szollosi, I. *et al.* Effect of CO<sub>2</sub> Inhalation on Central Sleep Apnea and Arousals From  
515 Sleep. *Respiration.* **71**, (2004).
- 516 31. Baddeley, H. *et al.* Gas exchange parameters in radiotherapy patients during breathing  
517 of 2%, 3.5% and 5% carbogen gas mixtures. *Br. J. Radiol.* **73**, 1100–1104 (2000).
- 518 32. Bradley, S. M., Simsic, J. M. & Atz, A. M. Hemodynamic effects of inspired carbon  
519 dioxide after the Norwood procedure. *Ann. Thorac. Surg.* **72**, 2084–2088 (2001).
- 520 33. Slater, E. C., Rosing, J. & Mol, A. The phosphorylation potential generated by  
521 respiring mitochondria. *Biochim. Biophys. Acta - Bioenerg.* **292**, 534–553 (1973).
- 522 34. Elliott-Kingston, C. *et al.* Does Size Matter? Atmospheric CO<sub>2</sub> May Be a Stronger  
523 Driver of Stomatal Closing Rate Than Stomatal Size in Taxa That Diversified under  
524 Low CO<sub>2</sub>. *Front. Plant Sci.* **7**, 1253 (2016).
- 525 35. Ludwików, A. *et al.* Arabidopsis protein phosphatase 2C ABI1 interacts with type I  
526 ACC synthases and is involved in the regulation of ozone-induced ethylene  
527 biosynthesis. *Mol. Plant* **7**, 960–976 (2014).
- 528 36. Bieluszewski, T. *et al.* AtEAF1 is a potential platform protein for Arabidopsis NuA4  
529 acetyltransferase complex. *BMC Plant Biol.* **15**, 75 (2015).
- 530 37. Hashimoto, M. *et al.* Arabidopsis HT1 kinase controls stomatal movements in response  
531 to CO<sub>2</sub>. *Nat. Cell Biol.* **8**, 391–7 (2006).
- 532 38. Gleave, A. A Versatile Binary Vector System With a T-DNA Organisational Structure  
533 Conducive to Efficient Integration of Cloned DNA Into the Plant Genome. *Plant Mol.*  
534 *Biol.* **20**, 1203–1207 (1992).



- 535 39. Finn, T. E., Nunez, A. C., Sunde, M. & Easterbrook-Smith, S. B. Serum Albumin  
536 Prevents Protein Aggregation and Amyloid Formation and Retains Chaperone-like  
537 Activity in the Presence of Physiological Ligands. *J. Biol. Chem.* **287**, 21530–21540  
538 (2012).
- 539 40. Allen, J. J. *et al.* A semisynthetic epitope for kinase substrates. *Nat. Methods* **4**, 511–6  
540 (2007).
- 541 41. Wu, F.-H. *et al.* Tape-Arabidopsis Sandwich - a simpler Arabidopsis protoplast  
542 isolation method. *Plant Methods* **5**, 16 (2009).
- 543 42. Fujikawa, Y. & Kato, N. Split luciferase complementation assay to study protein-  
544 protein interactions in Arabidopsis protoplasts. *Plant J.* **52**, 185–95 (2007).
- 545 43. Tzfira, T. *et al.* pSAT vectors: a modular series of plasmids for autofluorescent protein  
546 tagging and expression of multiple genes in plants. *Plant Mol. Biol.* **57**, 503–16 (2005).
- 547 44. Liu, Q., Li, M. Z., Leibham, D., Cortez, D. & Elledge, S. J. The univector plasmid-  
548 fusion system, a method for rapid construction of recombinant DNA without restriction  
549 enzymes. *Curr. Biol.* **8**, 1300–9 (1998).
- 550 45. Schneider, C. A., Rasband, W. S. & Eliceiri, K. W. NIH Image to ImageJ: 25 years of  
551 image analysis. *Nat. Methods* **9**, 671–5 (2012).
- 552
- 553

554 **Figures**

555

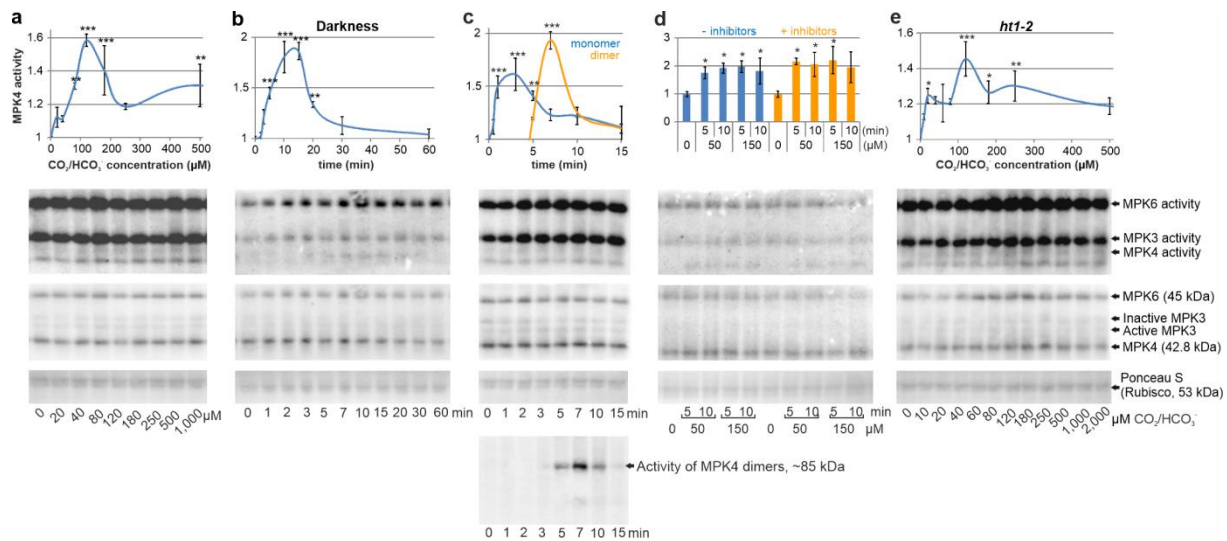

556

557

558 **Fig. 1. Activation of MPK4 by [CO<sub>2</sub>]<sub>high</sub> in Arabidopsis epidermal peels.**

559 **a**, Measurement of MPK4 activity in response to the indicated [CO<sub>2</sub>]. **b**, **c**, Time course of  
560 MPK4 activation by darkness (**b**) and 180 μM HCO<sub>3</sub><sup>-</sup> (**c**). Strong activation of 85-kDa MPK  
561 was identified in response to 7-minute exposure to HCO<sub>3</sub><sup>-</sup> (orange line). Identical molecular  
562 mass, appearance time points and intensity changes in the 85-kDa protein band were found for  
563 both anti-TEY and anti-MPK4 (Supplementary Fig. 2) antibodies, indicating that dimeric  
564 MPK4 is ~85-kDa active MPK. **d**, MPK4 activation by [CO<sub>2</sub>]<sub>high</sub> is independent of MAPK  
565 cascades – MKK inhibitors do not abolish MPK4 activation by [CO<sub>2</sub>]<sub>high</sub>. Epidermal peels  
566 were preincubated with both 50 μM PD98059 and 5 μM U0126 for 1.5 h before addition of  
567 the indicated concentration of dissolved CO<sub>2</sub>. **e**, MPK response to [CO<sub>2</sub>]<sub>high</sub> in *ht1-2*.

568 MPK4 activity was studied in an open system: epidermal peels were incubated in stomatal  
569 opening buffer in open tubes, ensuring continuous CO<sub>2</sub> exchange with ambient air. Then,  
570 darkness or specified CO<sub>2</sub> concentrations were applied for the indicated time or 15 min,  
571 respectively. To gain insight into MPK4 activity and separate it from highly active MPK3,  
572 high-resolution electrophoresis was applied, followed by immunodetection of active MPKs  
573 with phospho-p44/42 MAPK (Erk1/2) (Thr202/Tyr204) antibody (anti-phospho-TEY) against  
574 the phosphorylated activation loop of MPKs. Protein loading was visualized by both Ponceau  
575 S staining and immunoblotting with anti-MPK3, anti-MPK4 and anti-MPK6 antibodies.  
576 Representative results from three independent experiments are presented. Error bars represent  
577 the standard deviation (SD). \*, \*\* and \*\*\* indicate significant differences in MPK4 activity  
578 (p<0.05, p<0.01 and p<0.001, respectively) compared to the control. The above data were

579 obtained on proteins isolated by phenol-SDS extraction for immediate separation of ATP<sup>33</sup>  
580 from MPKs to prevent their extracellular activation. In contrast, we were unable to detect the  
581 activity of guard cell MPK4 purified under native conditions (Supplementary Fig. 9).  
582

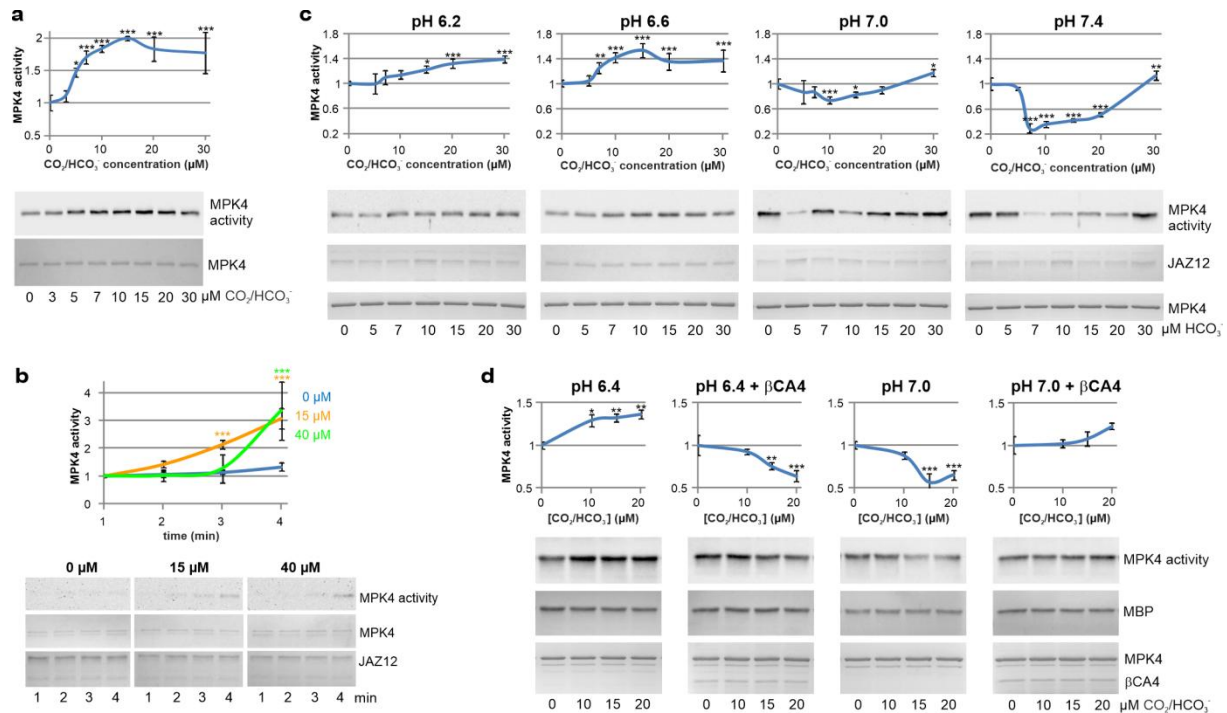

583

584

585 **Fig. 2.  $[\text{CO}_2]_{\text{high}}$  directly activates MPK4 *in vitro*.** **a**,  $[\text{CO}_2]_{\text{high}}$  enhances the phosphorylation  
586 of the MPK4 kinase activation loop, as shown by immunoblotting using anti-phospho-TEY.  
587 The *in vitro* phosphorylation reaction at pH 7.0 was carried out at 24°C for 1 min upon the  
588 addition of the indicated  $[\text{CO}_2]$ . **b**, Time course of MPK4 activation by  $\text{HCO}_3^-$  at pH 6.4  
589 presented as the intensity of JAZ12 thiophosphorylation using immunoblotting with anti-  
590 thiophosphate ester antibody (anti-TE). **c**, pH-dependent MPK4 activity regulation by  $\text{HCO}_3^-$ .  
591 Thiophosphorylation (24°C, 15 min) of JAZ12 followed by immunoblotting with anti-TE. **d**,  
592  $\text{HCO}_3^-/\text{CO}_2$  conversion by  $\beta\text{CA4}$  reverses the pH-dependent MPK4 activation pattern. *In vitro*  
593 phosphorylation with MBP as a substrate were preincubated for 25 min in the  
594 presence or absence of  $\beta\text{CA4}$ . Then, MPK4 was added and incubated for 25 min. MPK4  
595 activity was detected by immunoblotting with anti-phospho-MBP. Experiments in (**a-d**) were  
596 carried out using MPK4 purified from bacteria and dephosphorylated by FastAP phosphatase  
597 GST-MPK4 (**b, c**) or tag-free MPK4 (**a, d**). Quantities of substrate proteins (**b-d**) and MPK4  
598 (**a**) were visualized by Ponceau S staining.  $\beta\text{CA4}$  and MPK4 in **b-d** were stained with  
599 Coomassie Brilliant Blue R-250 (CBB). Representative results from three independent  
600 experiments are presented; mean  $\pm$ SD; \*, \*\* and \*\*\* indicate  $p < 0.05$ ,  $p < 0.01$  and  $p < 0.001$ ,  
601 respectively.

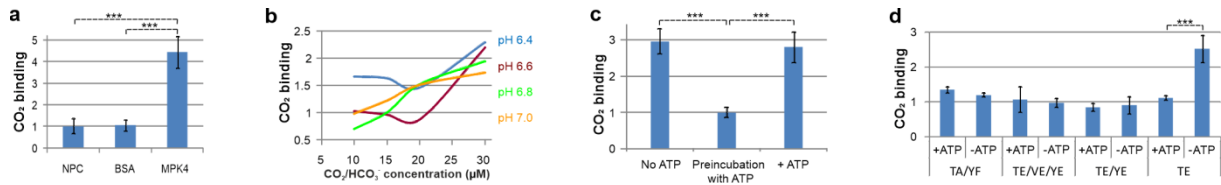

602

603

604 **Fig. 3. MPK4 binds CO<sub>2</sub>.** **a**, <sup>14</sup>CO<sub>2</sub> (10 μM H<sup>14</sup>CO<sub>3</sub><sup>-</sup> incubated at pH 6.4) is effectively  
605 coeluted from a size-exclusion chromatography column with MPK4 in contrast to BSA or a  
606 no-protein control (NPC). The experimental design is illustrated in Supplementary Fig. 5a. **b**,  
607 Efficiency of CO<sub>2</sub> binding at increasing [<sup>14</sup>CO<sub>2</sub>] in a pH series. Charts of individual pH series,  
608 including error bars, are shown in Supplementary Fig. 5b. **c**, MPK4 autophosphorylation  
609 prevents effective CO<sub>2</sub> binding. MPK4 preincubated with ATP for 2 min is not able to bind  
610 CO<sub>2</sub> in contrast to both reactions containing ATP without a preincubation step or ATP-free  
611 reactions. **d**, MPK4 with only T201 of TEY phosphorylated is still able to bind CO<sub>2</sub> in the  
612 absence of ATP, in contrast to MPK4 with double TEY phosphorylation. In **c-d**, MPK4  
613 incubation with 15 μM H<sup>14</sup>CO<sub>3</sub><sup>-</sup> was carried out for 10 min at pH 7.0. Plotted values of  
614 disintegrations per minute (DPM) after normalization based on background radioactivity in  
615 individual experiments. Mean ±SD; n=3; \*\*\* indicates p<0.001.

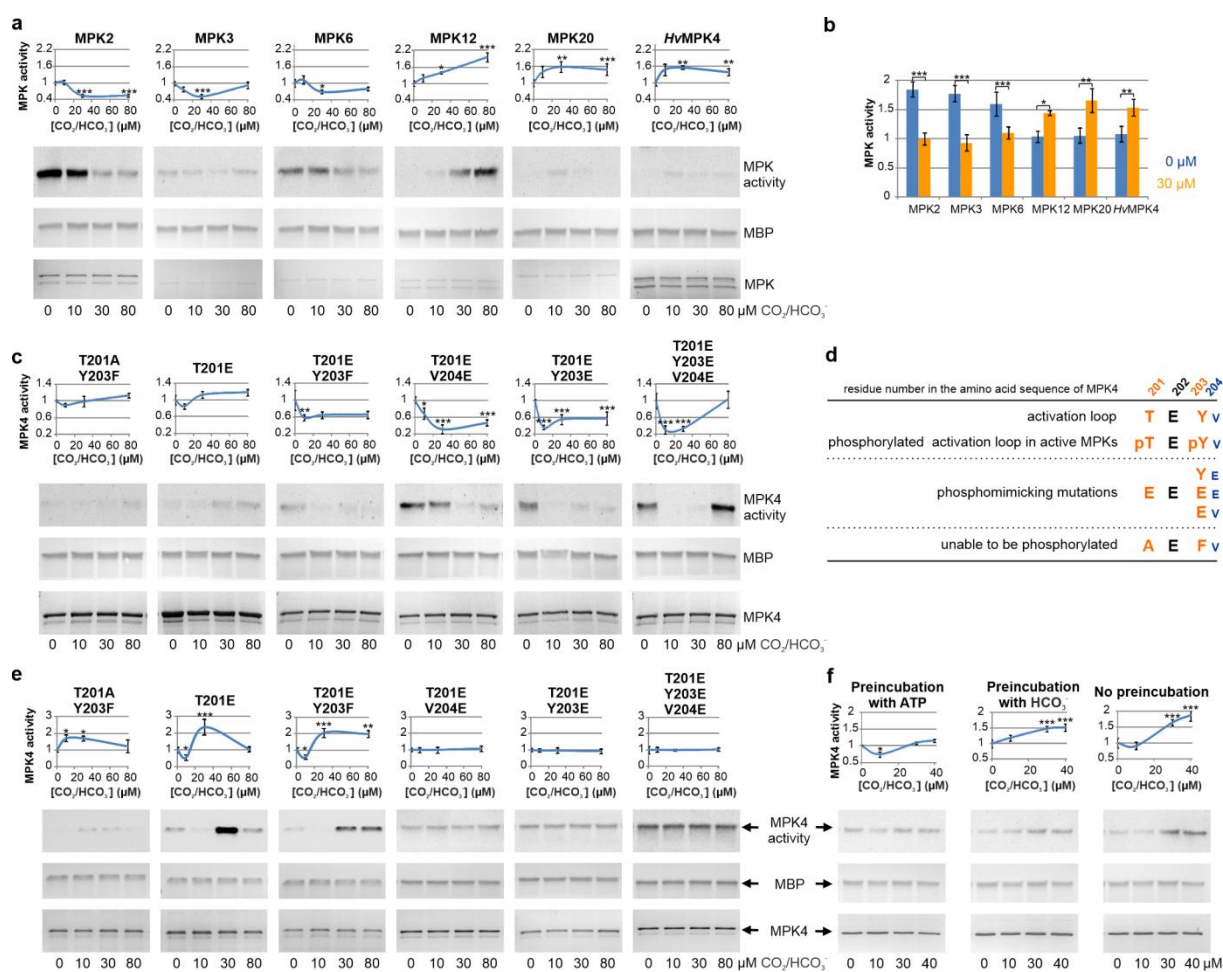

616

617

618 **Fig. 4. The MPK response to CO<sub>2</sub> is governed by initial MPK activity.** **a**, Highly active  
 619 MPKs are downregulated by HCO<sub>3</sub><sup>-</sup> in contrast to MPKs with low kinase activity. The MPK4  
 620 homologue from barley was included in this analysis due to the quickest response of barley  
 621 stomata to darkness among the studied species<sup>34</sup>. For more details, see Supplementary Fig. 10.  
 622 GST-MPK fusion proteins for *in vitro* phosphorylation were purified from bacteria. **b**, A  
 623 summary of the data presented in **a**. **c**, Mutations presented in **d** alter the MPK4 response to  
 624 [CO<sub>2</sub>]<sub>high</sub>. **d**, Schematic representation of generated mutations mimicking phosphorylated or  
 625 unphosphorylatable amino acids in the kinase activation loop (red) and the following valine  
 626 (blue) in MPK4. **e**, Increasing the CO<sub>2</sub>/HCO<sub>3</sub><sup>-</sup> ratio by lowering the pH from 7.0 (shown in **c**)  
 627 to 6.6 disables the inhibition of active versions of MPK4 by HCO<sub>3</sub><sup>-</sup> and indicates that T201 is  
 628 responsible for this effect. **f**, WT MPK4 inactivation by 10 μM HCO<sub>3</sub><sup>-</sup> is promoted by MPK4  
 629 phosphorylation. Preincubation with either HCO<sub>3</sub><sup>-</sup> or ATP was carried out for 10 min (24°C).  
 630 Dephosphorylated MBP was used as an MPK4 substrate during *in vitro* phosphorylation (30  
 631 min, 30°C), followed by immunoblotting with anti-phospho-MBP. In **a**, **c**, **e**, kinase activity  
 632 was measured by *in vitro* MBP thiophosphorylation (15 min, 24°C) detected by

633 immunoblotting using anti-TE. Dephosphorylated kinases were used in all assays to exclude  
634 any effects of phosphorylated amino acids other than the TEY motif. Loading of MPKs was  
635 visualized by CBB, while MBP was visualized by Ponceau S. Representative results from  
636 three independent experiments are presented. Mean  $\pm$ SD; \*, \*\* and \*\*\* indicate  $p < 0.05$ ,  
637  $p < 0.01$  and  $p < 0.001$ , respectively.

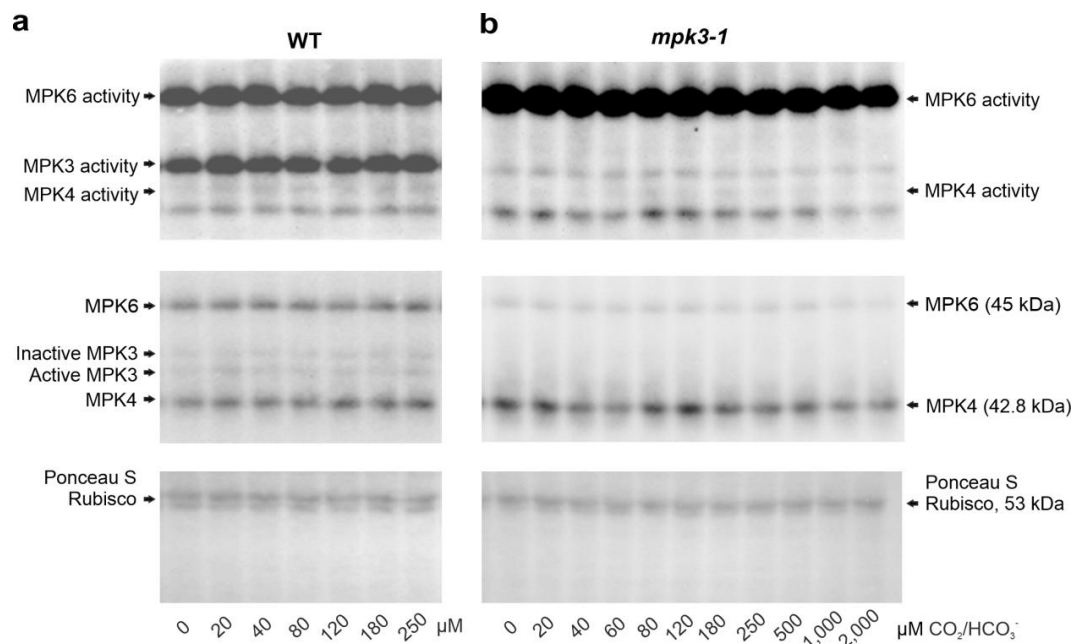

638

639

### 640 **Supplementary Fig. 1**

641 Additional experiments showing MPK4 activation by CO<sub>2</sub> in epidermal peels. **a**, Similar to  
642 dissolved CO<sub>2</sub>, an increase in [HCO<sub>3</sub><sup>-</sup>] induces MPK4 activity. **b**, A study on MPK activity in  
643 epidermal peels of *mpk3-1* showed that strong immunoblotting signals from MPK3 did not  
644 influence the measurement of MPK4 activity. Before administration of the indicated [HCO<sub>3</sub><sup>-</sup>],  
645 epidermal peels were incubated at pH 5.7 in open tubes ensuring stabilization of [CO<sub>2</sub>], which  
646 may fluctuate due to CO<sub>2</sub> consumption and production by epidermal peels. Then, the  
647 indicated [HCO<sub>3</sub><sup>-</sup>] was added for 15 min. Active MPKs were immunodetected with anti-  
648 phospho-TEY following SDS-PAGE. Protein loading was assessed by Ponceau S staining and  
649 immunoblotting with anti-MPK3, anti-MPK4 and anti-MPK6 antibodies. Data from two  
650 biological replicates.



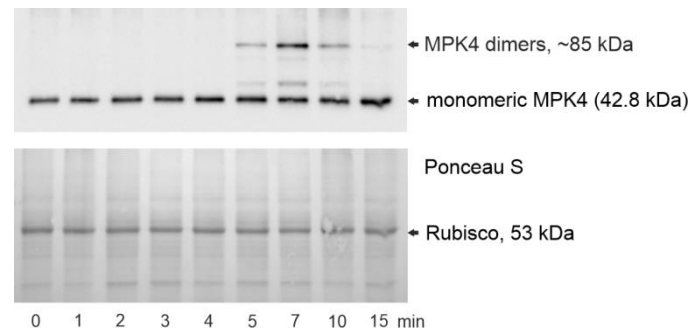

651

652

### 653 **Supplementary Fig. 2**

654 An additional MPK4 band was recognized in response to exposure to 180  $\mu\text{M}$   $\text{HCO}_3^-$ . Due to  
655 the double molecular mass compared to monomeric MPK4 and known MPK4 susceptibility  
656 to multimerization, we expect that the most likely modification of ~85-kDa MPK4 is covalent  
657 dimerization. Protein bands of the same molecular weight, emerging time points and intensity  
658 profile were detected using anti-TEY and anti-MPK4 antibodies (Fig. 1c), indicating that  
659 dimeric MPK4 is ~85-kDa active MPK. The amounts of proteins were determined by staining  
660 with Ponceau S and immunoblotting with anti-MPK4. Representative results from three  
661 experiments are presented.

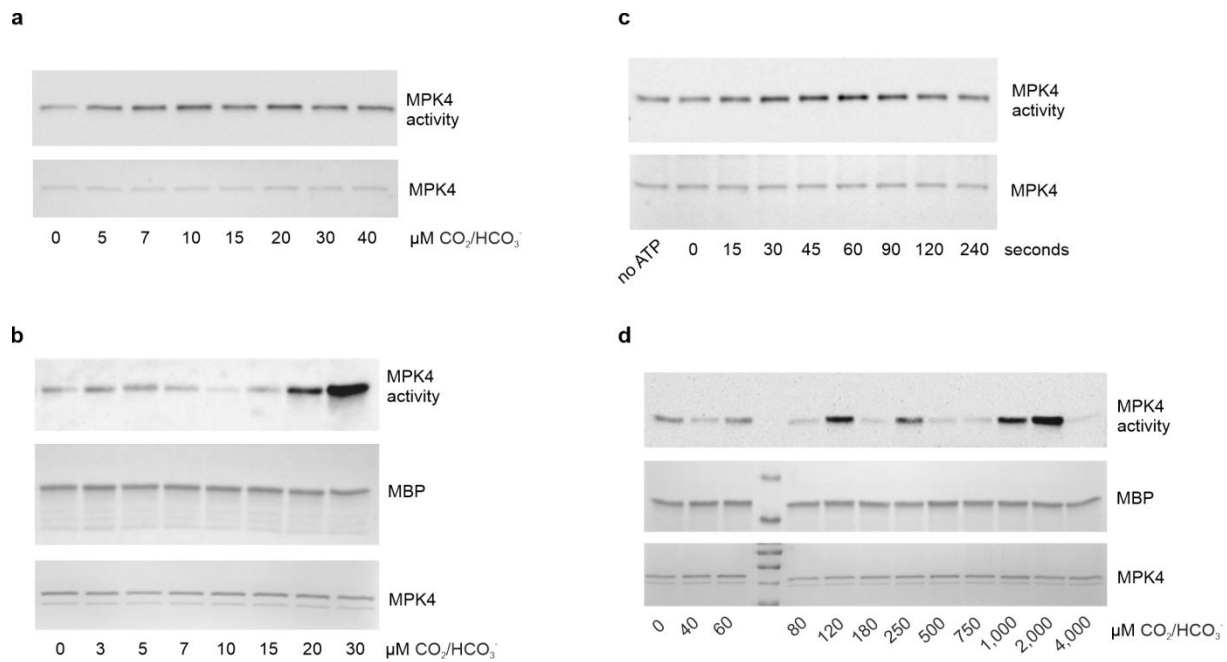

662

663

### 664 **Supplementary Fig. 3**

665 Investigation of *in vitro* MPK4 activation by  $\text{CO}_2/\text{HCO}_3^-$  (at pH 7.0). **a, b**, Similar to  
666 dissolved  $\text{CO}_2$ ,  $\text{KHCO}_3$  regulates MPK4 activity. **c**, MPK4 activation in response to  $[\text{CO}_2]_{\text{high}}$   
667 occurs in just a few seconds. **d**, Very high  $\text{CO}_2/\text{HCO}_3^-$  concentrations can positively or  
668 negatively regulate MPK4 activity. The lack of MPK4 activation in response to millimolar  
669  $\text{CO}_2/\text{HCO}_3^-$  concentration is consistent with a previous report<sup>2</sup>. In **a, c**, MPK4 activity is  
670 shown by immunoblotting with anti-phospho-TEY and MPK4 loading by staining with  
671 Ponceau S. In **b, d**, MPK4 activity was determined by MBP *in vitro* thiophosphorylation and  
672 detected by immunoblotting with anti-TE. MPK4 was stained with CBB, and MBP was  
673 stained with Ponceau S. Experiments were carried out using MPK4 purified from bacteria and  
674 dephosphorylated by FastAP phosphatase; GST-MPK4 (**c**), tag-free MPK4 (**a-b, d**).  
675 Representative results from three independent experiments are presented.

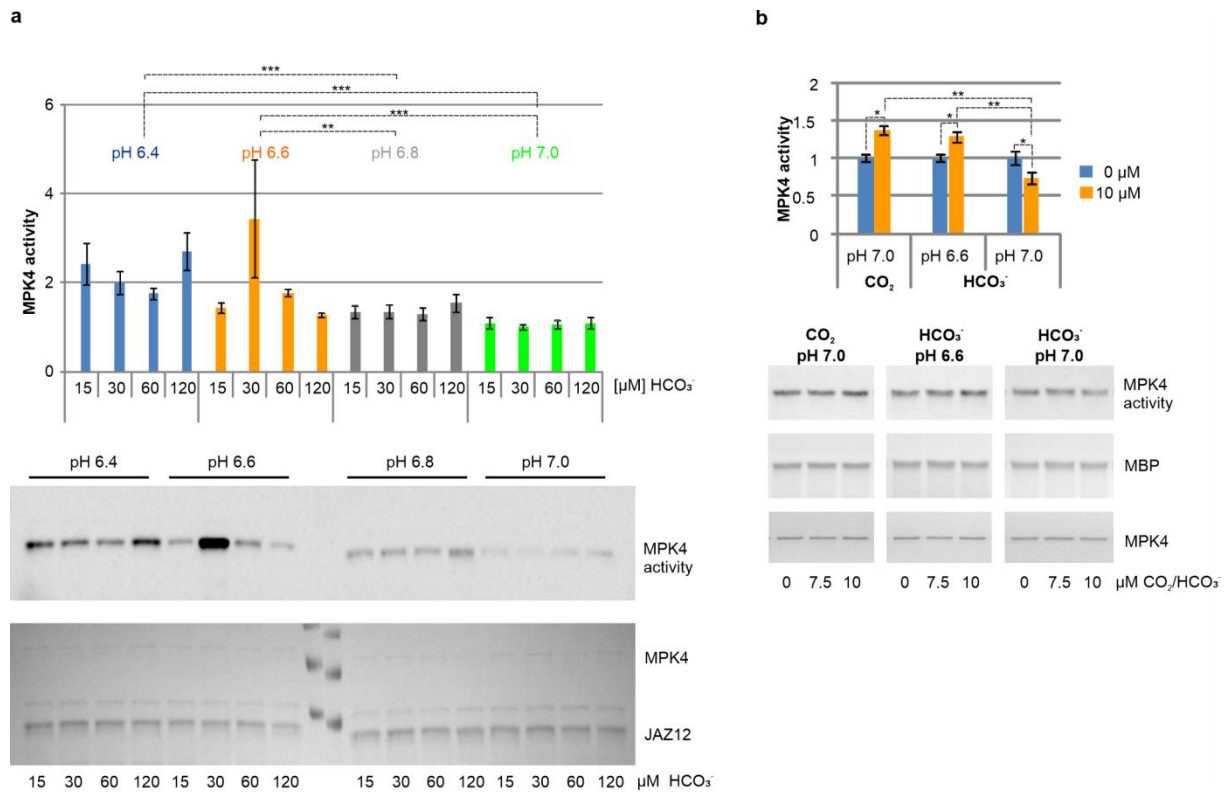

676

677

#### 678 **Supplementary Fig. 4**

679 Increase in [CO<sub>2</sub>] enhances MPK4 kinase activity, and increase in [HCO<sub>3</sub><sup>-</sup>] reduces MPK4  
 680 kinase activity. **a**, Elevation of [HCO<sub>3</sub><sup>-</sup>] at constant [CO<sub>2</sub>] triggers MPK4 inactivation. *In vitro*  
 681 thiophosphorylation reactions with different [CO<sub>2</sub>/HCO<sub>3</sub><sup>-</sup>] in the pH series were allowed  
 682 exchange with ambient air for 30 min, leading to equalization of [CO<sub>2</sub>] in all samples so that  
 683 they differed in only [HCO<sub>3</sub><sup>-</sup>]. Then, MPK4 and ATPγS were added, and *in vitro*  
 684 thiophosphorylation reactions were carried out for only 2 min. High pH and concomitant high  
 685 [HCO<sub>3</sub><sup>-</sup>] led to low MPK4 activity. JAZ12 was thiophosphorylated by dephosphorylated  
 686 GST-MPK4, and its activity was detected using immunoblotting with anti-TE. JAZ12 and  
 687 MPK4 bands were stained by Ponceau S. **b**, MPK4 is activated by 7.5-10 μM CO<sub>2</sub> at pH 7.0  
 688 but inactivated by 7.5-10 μM HCO<sub>3</sub><sup>-</sup>. Lowering the pH to 6.6 (increase in free [CO<sub>2</sub>] and  
 689 decrease in [HCO<sub>3</sub><sup>-</sup>]) leads to reversal of the HCO<sub>3</sub><sup>-</sup>-induced MPK4 activity profile to that  
 690 triggered by dissolved CO<sub>2</sub>. MBP was used as a substrate of tag-free MPK4, and MPK4  
 691 activity was detected by immunoblotting with anti-phospho-MBP. MBP loading was  
 692 visualized by Ponceau S, and MPK4 loading was visualized by CBB. Representative data  
 693 from three experiments. Mean ±SD; \*, \*\* and \*\*\* indicate p<0.05, p<0.01 and p<0.001,  
 694 respectively.

**a**

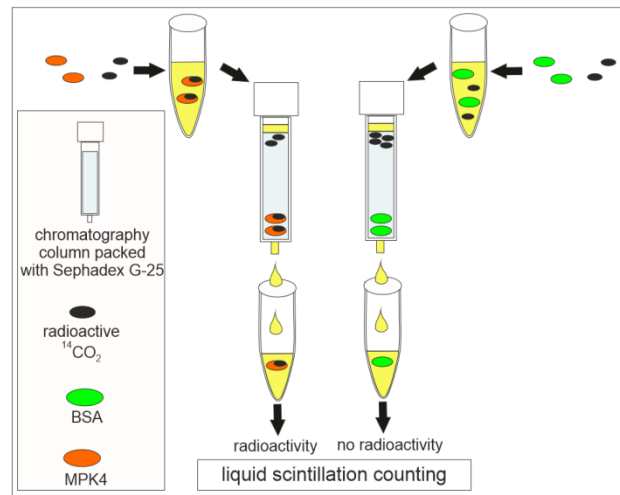

**b**

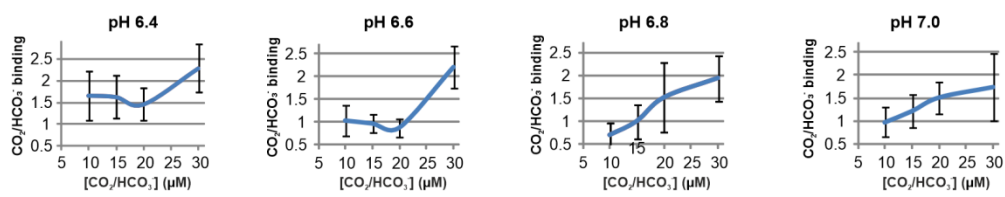

**c**

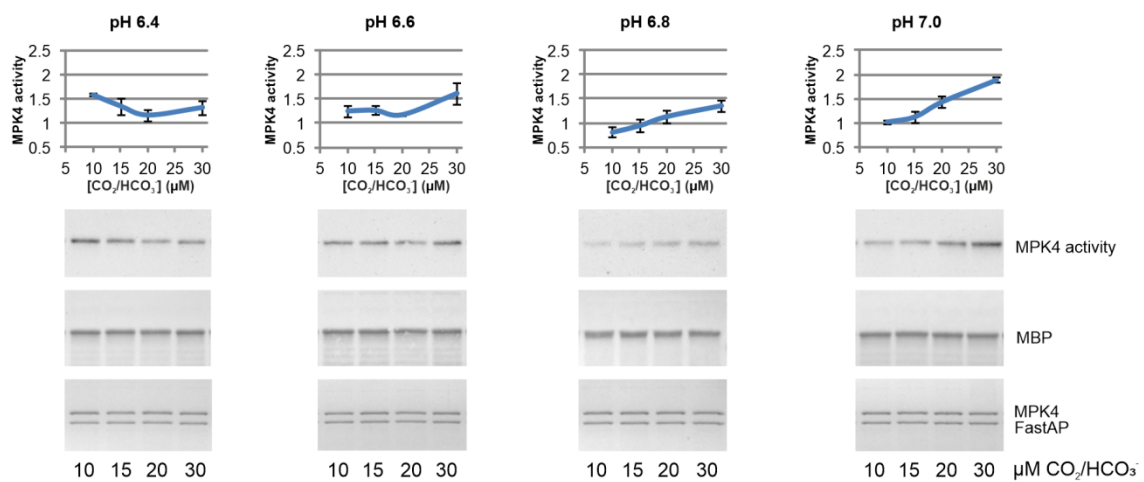

**d**

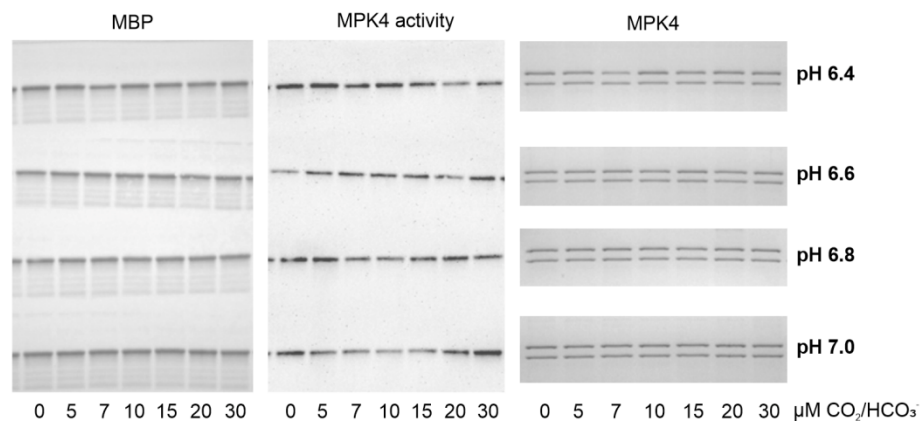

695

696

697 **Supplementary Fig. 5**

698 Increase in MPK4 activity is correlated with enhanced CO<sub>2</sub> binding. **a**, Scheme of gel  
699 filtration-based CO<sub>2</sub> binding assay. **b**, Graphs of CO<sub>2</sub> binding at 10-30 μM CO<sub>2</sub>/HCO<sub>3</sub><sup>-</sup> in  
700 individual pH series from the graph shown in Fig. 3b; data normalization was based on values  
701 of no-protein controls from each experiment; mean ±SD, n=3 experiments. **c**, MPK4 activity  
702 under the conditions applied for the CO<sub>2</sub> binding assay shown in **b**. Dephosphorylated MBP  
703 was used as a substrate of dephosphorylated tag-free MPK4; FastAP- fast alkaline  
704 phosphatase. The intensity of MBP phosphorylation was detected by immunoblotting with  
705 anti-phospho-MBP. The amount of MBP was determined by Ponceau S, and the amount of  
706 MPK4 was determined by CBB. Mean ± SD, n=3 experiments. **d**, Example original images of  
707 immunoblotting and protein staining used to calculate data for graphs presented in **c**.

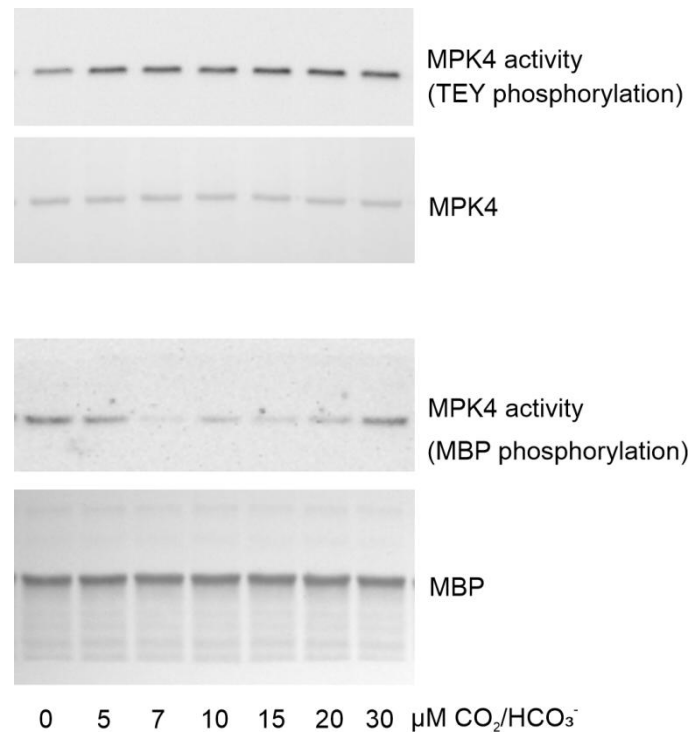

708

709

710 **Supplementary Fig. 6**

711  $[\text{CO}_2]_{\text{high}}$ -induced TEY phosphorylation is not inhibited by  $\text{HCO}_3^-$  at  $\text{pH} \geq 7$ , unlike the  
712 decrease in MPK4 activity, defined as substrate phosphorylation intensity. TEY and MBP  
713 phosphorylation is shown by immunoblotting with anti-phospho-TEY and anti-phospho-  
714 MBP, respectively. Both analyses were carried out from one set of *in vitro* phosphorylation  
715 reactions. The amounts of dephosphorylated MBP and dephosphorylated MPK4 on the  
716 nitrocellulose membrane were specified by Ponceau S staining. Representative images from  
717 three experiments.

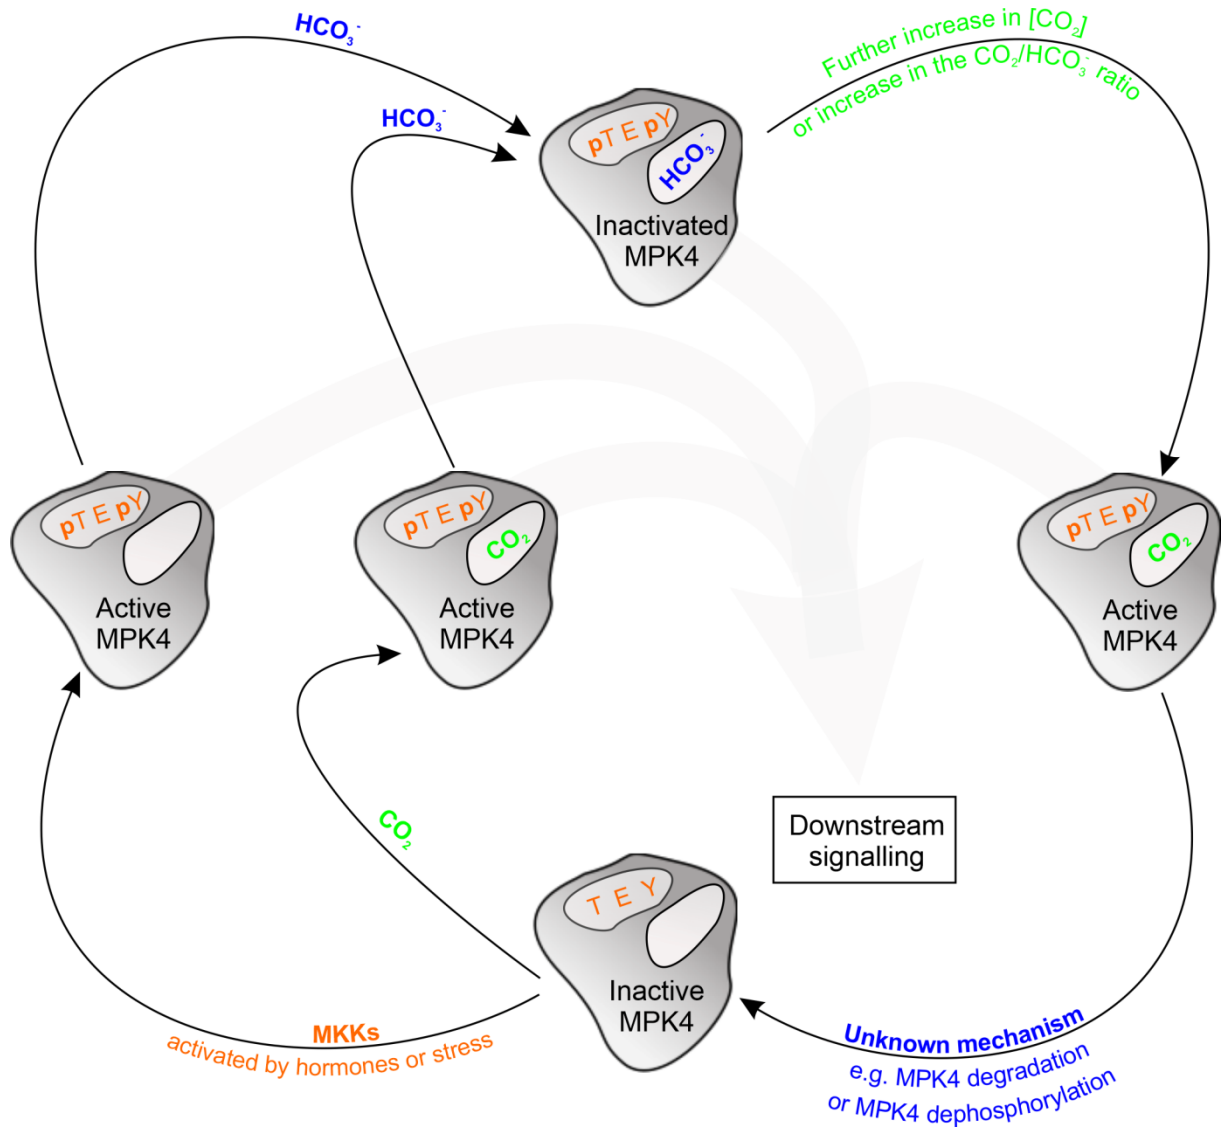

718

719

720 **Supplementary Fig. 7**

721 Proposed working model of the MPK4 response to [CO<sub>2</sub>/HCO<sub>3</sub><sup>-</sup>]<sub>high</sub>.

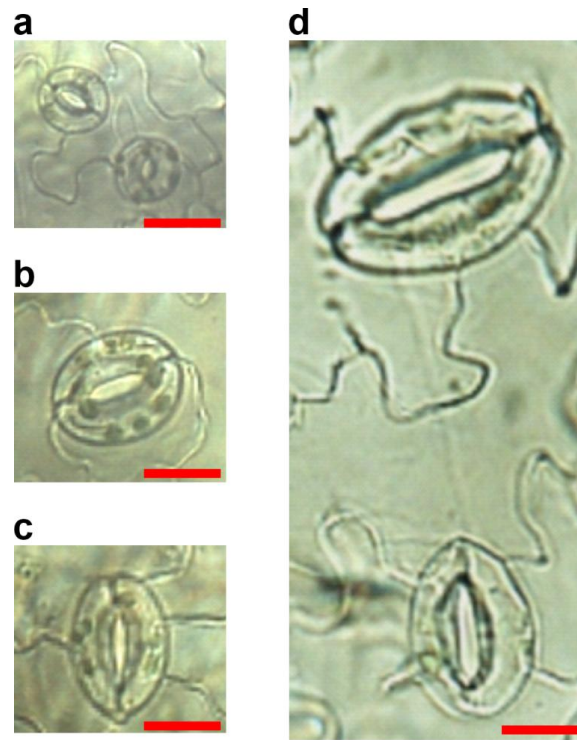

722

723

724 **Supplementary Fig. 8**

725 MPK4 influences stomatal development. **a**, Stomata of WT Arabidopsis. **b-d**, Enlarged and  
726 elongated stomata in *mpk4-2* leaves. Scale bars 20 μm. As reported for stomata of an *N.*  
727 *tabacum* line with silenced *NtMPK4*<sup>1</sup>, *mpk4-2* stomata display a much wider range of length  
728 than WT stomata.



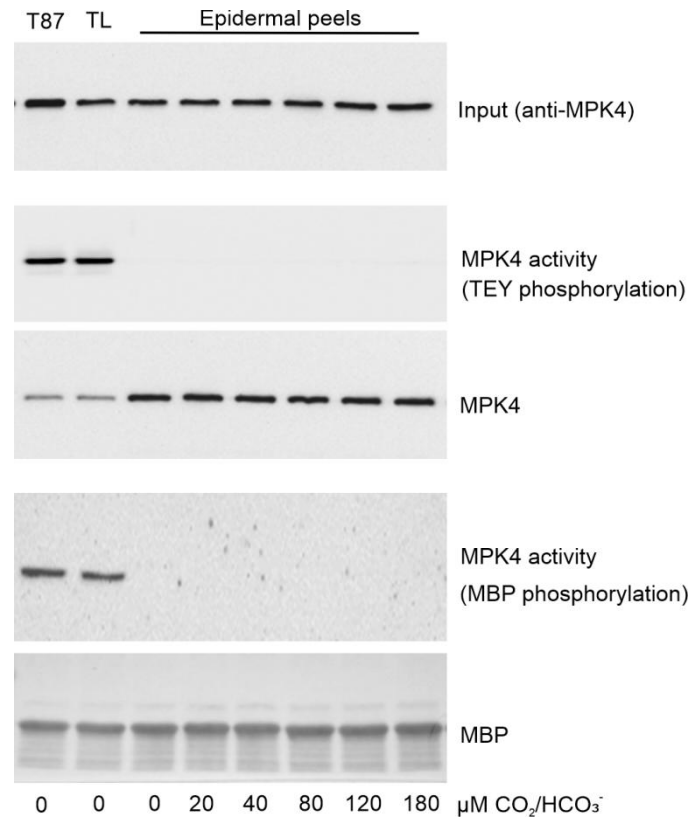

729

730

### 731 **Supplementary Fig. 9**

732 Inactive One-STrEP-Tag-MPK4 was specifically purified from Arabidopsis epidermal peels  
733 under native conditions. Anti-phospho-TEY antibody and MBP *in vitro* phosphorylation  
734 experiments failed to detect the activity of guard cell One-STrEP-Tag-MPK4 in contrast to  
735 One-STrEP-Tag-MPK4 from Arabidopsis total leaf (TL) extracts or T87 cultured cells. We  
736 used a powerful method for specific purification of One-STrEP-tagged plant proteins under  
737 native conditions within several minutes<sup>35,36</sup>. In contrast to high-yield One-STrEP-Tag-MPK4  
738 purification from epidermal peels, we were not able to detect One-STrEP-Tag-MPK4 activity  
739 by *in vitro* MBP phosphorylation. Based on the membrane-associated localization of barley  
740 MPK4 (Supplementary Fig. 10b), we hypothesize that MPK4 activatable by  $[\text{CO}_2]_{\text{high}}$  is  
741 connected to the cell membrane. In addition, the use of phenol-SDS extraction (Fig. 1,  
742 Supplementary Fig. 1), which increases membrane protein solubilization and decreases  
743 protein interactions, underlies the successful detection of MPK4 activity.

a

```
BAJ97968 CCYFLYCLLRGLKRVHSANVLRDLEKPSNLFNLNANCDLKIADPGLARTTSETDLNTEYVTRWYRPAPELLLNCSQYTAADVWWSVGCILGEIITRQELFPGRDYICQLRLITELIGSPDDS  
Arabidopsis CRFFLYCLLRGLKRVHSANVLRDLEKPSNLLNANCDLKIADPGLARTKSETDFNTEYVTRWYRPAPELLLNCSQYTAADVWWSVGCILGETMTRPELFPGRDYVHCLRLITELIGSPDDS  
BAJ95789 CCYFLYCVLRGLKRVHSAKVLHRDLRPSNLLLNACELRIGDFGLARTTSETDFNMEYVTRWYRPAPELLLNCSQYTAADVWWSVGCILGEIAMPRELPFGKDYVHCLRLITELIGSPDDT  
*:*:*:*:*:*:*:*:*:*:*:*:*:*:*:*:*:*:*:*:*:*:*:*:*:*:*:*:*:*:*:*:*:*:*:*:*:*:*:*:*:*:*:*:*:*:*:*:*:*:*:*:*:*:*:*:*:*:*:*:*:*:*:*:*:*:*:*:*:*:*:*:*:*:*:
```

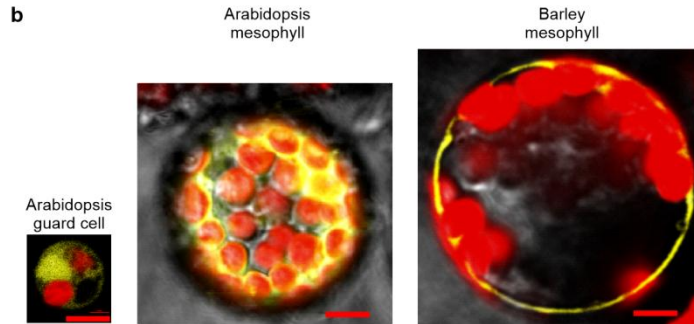

744

745

### 746 **Supplementary Fig. 10**

747 **a**, Alignment (using ClustalX 2.1) of amino acid sequences of Arabidopsis MPK4 and its two  
748 barley homologues. The response of barley stomata to darkness is the quickest among the  
749 studied species<sup>34</sup>. It may be speculated that this results from the presence of two specialized  
750 MPK4 homologues in barley guard cells. The protein encoded by the BAJ95789 locus shares  
751 lower identity (82%) with Arabidopsis MPK4 than the MPK encoded by BAJ97968 (83%).  
752 Moreover, the polypeptide encoded by BAJ95789 does not contain the TEY motif (in a black  
753 frame); therefore, the barley MPK encoded in the BAJ97968 locus was included in the  
754 comparative analysis of [CO<sub>2</sub>]<sub>high</sub>-induced MPK activity in Fig. 4a, and the expression in  
755 barley protoplasts is presented in **b**. **b**, Barley MPK4-YFP in barley mesophyll protoplasts is  
756 localized in the proximity of the cell membrane, in contrast to Arabidopsis MPK4-YFP,  
757 which was predominantly dispersed in the cytoplasm and nucleus in both the Arabidopsis  
758 mesophyll and Arabidopsis guard cell protoplasts. Bar, 2.5 μm.
